# Supplementary material for: Multiscale patterns of isolation by ecology and fine-scale population structure in Texas bobcats
Source: PeerJ. 2021 Jun 3;9:e11498. doi: 10.7717/peerj.11498 (PMC8180196; doi:10.7717/peerj.11498)
Supplement: Supplemental Information 8 — Raw data for genetic analyses, including genotypes, geographic data, and output for descriptive statistics using GenAlEx. [file peerj-09-11498-s008.xlsx]

## Sheet: GGD_all2
1	102	1	102
	Genotypes_GPS	Geographic Distance
BGWMA02	BGWMA03	JM003	JM004	JM012	J003	J004	LYRU001	LYRU003	LYRU004	LYRU005	LYRU006	LYRU007	LYRU008	LYRU009	LYRU010	LYRU011	LYRU012	LYRU013	LYRU014	LYRU015	LYRU016	LYRU017	LYRU018	LYRU019	LYRU020	LYRU021	LYRU024	LYRU025	LYRU026	LYRU027	LYRU028	LYRU029	LYRU030	LYRU031	LYRU032	LYRU034	LYRU035	LYRU036	LYRU038	LYRU039	LYRU040	LYRU041	LYRU043	LYRU044	LYRU047	LYRU051	LYRU059	LYRU066	LYRU067
0
0	0
336.592	336.592	0
308.398	308.398	30.5979	0
345.954	345.954	33.1553	41.8218	0
342.943	342.943	42.7363	44.766	11.1691	0
342.943	342.943	42.7363	44.766	11.1691	0	0
611.072	611.072	332.363	360.077	352.108	362.874	362.874	0
612.243	612.243	324.549	353.011	342.628	353.206	353.206	22.3941	0
543.265	543.265	223.196	253.611	233.868	243.436	243.436	142.895	125.561	0
543.265	543.265	223.196	253.611	233.868	243.436	243.436	142.895	125.561	0	0
574.376	574.376	267.676	297.386	282.14	292.262	292.262	88.3173	69.9061	55.841	55.841	0
642.059	642.059	352.369	381.146	369.487	379.928	379.928	38.3506	29.8177	146.163	146.163	90.7583	0
608.664	608.664	332.379	359.869	352.576	363.389	363.389	5.85275	27.8885	146.001	146.001	91.9653	43.5917	0
609.237	609.237	330.461	358.166	350.23	361	361	1.91848	21.9772	141.403	141.403	86.9646	39.5073	5.91203	0
611.072	611.072	332.363	360.077	352.108	362.874	362.874	0	22.3941	142.895	142.895	88.3173	38.3506	5.85275	1.91848	0
572.798	572.798	236.415	265.581	232.626	238.903	238.903	234.383	213.85	101.698	101.698	147.409	226.369	238.558	233.224	234.383	0
723.707	723.707	422.33	452.147	435.597	445.415	445.415	122.478	113.983	202.389	202.389	154.805	85.3116	127.006	123.906	122.478	255.143	0
667.154	667.154	350.231	380.692	359.565	368.713	368.713	122.786	102.067	127.133	127.133	95.3618	91.909	128.634	122.977	122.786	166.321	88.9687	0
653.593	653.593	332.696	363.255	340.658	349.55	349.55	133.371	111.455	110.867	110.867	88.5774	106.919	139.106	133.246	133.371	142.908	112.469	23.5008	0
659.852	659.852	372.174	400.884	389.398	399.844	399.844	50.7947	48.4626	165.457	165.457	110.328	19.9207	54.8404	52.4006	50.7947	242.927	72.6167	99.0074	116.926	0
693.358	693.358	437.218	463.622	459.004	469.944	469.944	110.351	126.727	252.203	252.203	196.633	111.837	108.434	112.046	110.351	337.947	134.559	194.452	213.798	97.3991	0
561.162	561.162	229.561	259.994	232.965	241.064	241.064	185.607	165.793	51.6408	51.6408	97.7411	180.897	189.52	184.352	185.607	50.6141	220.37	134.389	112.541	198.577	291.447	0
606.051	606.051	287.761	318.204	297.622	306.94	306.94	116.804	94.8206	64.6225	64.6225	45.9246	103.645	121.782	116.011	116.804	122.987	141.822	62.5104	47.8304	119.942	215.456	80.3831	0
594.5	594.5	264.761	295.278	268.955	277.146	277.146	170.319	148.864	62.6538	62.6538	87.8602	158.928	174.96	169.353	170.319	68.3855	188.549	100.73	78.0303	174.944	270.747	36.1685	55.2911	0
553.738	553.738	222.663	253.142	226.678	234.933	234.933	184.122	164.79	46.8099	46.8099	95.8898	181.043	187.853	182.808	184.122	54.9095	223.386	138.396	117.034	199.088	290.95	7.84606	82.3546	42.3043	0
570.009	570.009	257.124	287.223	269.782	279.632	279.632	107.936	89.0291	38.3505	38.3505	19.7345	108.069	111.661	106.612	107.936	127.79	165.817	97.1531	85.7076	127.22	215.667	78.0113	38.4394	70.08	76.1988	0
609.552	609.552	291.525	321.963	301.42	310.74	310.74	115.564	93.4482	68.3677	68.3677	47.4931	101.309	120.633	114.826	115.564	125.671	138.148	58.7742	44.5623	117.302	213.146	83.6988	3.79971	57.6869	85.8256	41.314	0
653.052	653.052	323.887	354.394	327.576	335.548	335.548	174.418	152.092	113.772	113.772	113.262	150.741	179.98	174.069	174.418	110.6	152.174	65.8507	44.6969	161.515	258.489	94.6697	67.3796	59.1388	101.284	102.852	66.2374	0
570.009	570.009	257.124	287.223	269.782	279.632	279.632	107.936	89.0291	38.3505	38.3505	19.7345	108.069	111.661	106.612	107.936	127.79	165.817	97.1531	85.7076	127.22	215.667	78.0113	38.4394	70.08	76.1988	0	41.314	102.852	0
589.081	589.081	259.001	289.506	263.05	271.22	271.22	172.636	151.412	59.6971	59.6971	88.7945	162.399	177.162	171.618	172.636	64.2209	193.806	106.256	83.6983	178.74	274.14	30.2147	58.829	5.95987	36.44	70.421	61.455	64.8879	70.421	0
646.712	646.712	318.613	349.163	323.055	331.206	331.206	166.383	144.022	106.206	106.206	104.397	143.576	171.905	165.993	166.383	110.049	149.052	61.2602	38.8887	154.958	252.163	90.145	58.511	54.106	96.4074	94.1513	57.3791	8.86896	94.1513	60.0051	0
580.013	580.013	250.575	281.115	255.258	263.588	263.588	169.858	149.076	50.8856	50.8856	84.234	161.712	174.183	168.755	169.858	64.8938	197.268	110.81	88.889	178.665	273.133	23.6521	59.0183	14.4938	28.725	65.198	62.0433	73.4485	65.198	9.51877	68.0627	0
570.009	570.009	257.124	287.223	269.782	279.632	279.632	107.936	89.0291	38.3505	38.3505	19.7345	108.069	111.661	106.612	107.936	127.79	165.817	97.1531	85.7076	127.22	215.667	78.0113	38.4394	70.08	76.1988	0	41.314	102.852	0	70.421	94.1513	65.198	0
635.243	635.243	322.11	352.376	333.291	342.813	342.813	99.0931	76.9604	99.4308	99.4308	61.908	75.8206	104.76	98.8695	99.0931	156.761	104.477	33.7541	34.8403	88.9164	186.224	117.102	37.3843	88.4013	119.504	65.848	33.7645	75.7618	65.848	92.9311	68.1456	94.7897	65.848	0
607.678	607.678	272.611	302.428	271.412	278.276	278.276	213.61	191.847	100.174	100.174	132.008	199.675	218.401	212.72	213.61	42.4564	218.361	129.535	106.093	214.438	311.324	53.6758	97.1636	44.1666	61.359	113.963	98.922	69.4442	113.963	43.6176	70.1561	50.365	113.963	125.806	0
525.608	525.608	205.861	236.219	217.243	226.968	226.968	151.861	136.135	17.7399	17.7399	67.9875	158.695	154.435	150.251	151.861	105.158	218.476	144.683	128.606	178.311	262.012	58.0694	82.1896	76.6865	51.5118	52.9174	85.9106	130.375	52.9174	72.9056	123.049	63.5572	52.9174	116.365	110.279	0
651.577	651.577	326.624	357.221	332.736	341.247	341.247	151.129	128.925	108.57	108.57	96.8366	126.393	156.772	150.872	151.129	126.434	130.672	42.486	20.261	136.992	233.99	101.19	51.7706	65.2691	106.632	89.8828	49.5508	24.5236	89.8828	71.199	18.806	77.914	89.8828	52.0665	87.8527	126.089	0
289.965	289.965	119.686	96.4145	99.7616	89.7418	89.7418	450.892	442.002	333.109	333.109	381.896	469.089	451.145	449.001	450.892	321.485	535.155	457.953	438.425	488.99	556.661	328.616	396.404	364.784	322.831	369.373	400.203	422.523	369.373	358.83	418.627	351.555	369.373	432.439	362.388	316.699	429.433	0
704.286	704.286	442.123	469.08	462.953	473.803	473.803	111.558	125.501	250.826	250.826	194.996	106.991	110.535	113.371	111.558	333.178	119.794	184.676	204.96	90.5197	17.4973	287.836	210.236	265.375	287.805	213.52	207.695	249.602	213.52	269.065	243.664	268.647	213.52	179.17	304.885	261.619	225.219	561.237	0
605.072	605.072	325.737	353.458	345.495	356.265	356.265	6.62744	20.7191	137.233	137.233	83.0942	41.8609	8.87539	4.73565	6.62744	229.708	126.817	122.64	132.128	55.9081	116.596	180.646	113.339	166.267	178.98	102.787	112.279	172.389	102.787	168.416	164.221	165.37	102.787	97.5519	209.788	145.865	149.422	444.267	118.068	0
724.954	724.954	435.76	464.821	451.763	462.011	462.011	114.228	113.766	222.613	222.613	169.984	84.3304	117.213	116.012	114.228	287.003	42.7322	123.978	146.981	65.3959	94.9255	248.019	167.695	218.991	249.99	184.486	164.326	189.403	184.486	223.779	185.229	225.892	184.486	131.102	252.698	237.17	166.464	551.51	79.015	120.022	0
308.103	308.103	100.877	81.372	77.7483	67.2424	67.2424	429.785	420.373	310.033	310.033	359.422	447.163	430.194	427.903	429.785	297.406	512.255	434.471	414.793	467.079	536.307	304.728	373.077	340.896	299	346.558	376.876	398.543	346.558	334.94	394.696	327.725	346.558	409.264	338.298	293.782	405.622	24.09	540.495	423.168	529.226	0
632.292	632.292	318.259	348.562	329.187	338.667	338.667	101.78	79.5161	95.3761	95.3761	59.7886	79.7013	107.387	101.481	101.78	152.041	109.046	35.5843	33.4153	93.2238	190.45	112.351	32.7763	83.6719	114.79	62.5168	29.1183	72.7002	62.5168	88.1787	64.8634	90.0195	62.5168	4.77072	121.337	112.436	49.4452	428.264	183.572	99.9792	135.873	405.054	0
676.514	676.514	352.914	383.511	359.348	367.896	367.896	153.797	132.528	133.253	133.253	113.995	123.885	159.622	153.873	153.797	150.941	111.487	32.033	25.4227	130.849	225.517	127.851	72.24	91.8515	133.327	110.531	69.2193	41.7047	110.531	97.7964	40.8926	104.609	110.531	58.1525	110.72	150.936	26.6957	456.125	215.118	153.229	150.267	432.317	57.6634	0
577.33	577.33	241.091	270.391	237.79	244.184	244.184	230.571	209.856	99.8044	99.8044	144.033	221.84	234.827	229.443	230.571	6.0482	249.536	160.664	137.225	238.21	333.518	48.2785	118.311	63.4006	53.2719	124.507	120.91	104.581	124.507	59.4826	104.1	60.7799	124.507	151.657	36.4434	104.256	120.59	327.091	328.547	225.994	281.667	303.007	146.954	144.992	0
624.633	624.633	289.608	316.486	278.973	283	283	294.959	273.2	173.023	173.023	212.186	280.306	299.729	294.06	294.959	73.9574	290.53	203.924	181.365	294.33	391.585	121.454	178.468	124.992	127.135	193.44	180.125	138.539	193.44	123.451	142.684	128.284	193.44	205.413	81.356	178.392	161.488	356.396	384.439	291.096	327.831	332.942	201.14	179.162	74.1781	0
308.103	308.103	100.877	81.372	77.7483	67.2424	67.2424	429.785	420.373	310.033	310.033	359.422	447.163	430.194	427.903	429.785	297.406	512.255	434.471	414.793	467.079	536.307	304.728	373.077	340.896	299	346.558	376.876	398.543	346.558	334.94	394.696	327.725	346.558	409.264	338.298	293.782	405.622	24.09	540.495	423.168	529.226	0	405.054	432.317	303.007	332.942	0
754.359	754.359	455.003	484.766	468.414	478.241	478.241	148.319	142.757	235.209	235.209	187.381	113.19	152.238	149.921	148.319	285.519	32.8314	119.289	142.62	97.5244	136.721	252.256	174.308	219.754	255.494	198.632	170.605	179.937	198.632	225.141	177.68	228.985	198.632	137.038	247.634	251.306	159.8	567.982	120.05	153.334	43.3388	545.086	141.555	138.419	279.811	317.249	545.086	0
607.669	607.669	271.207	299.375	263.94	269.093	269.093	262.756	241.205	139.549	139.549	179.049	249.623	267.412	261.801	262.756	42.512	265.507	177.379	154.222	264.375	361.288	88.0517	146.815	92.4527	93.934	160.151	148.709	113.72	160.151	90.5196	116.468	94.9541	160.151	175.656	49.9643	145.357	135.011	347.331	354.794	258.718	301.201	323.462	171.224	155.328	41.6512	33.5566	323.462	293.657	0
595.151	595.151	265.368	295.883	269.52	277.699	277.699	170.553	149.073	63.3108	63.3108	88.2522	159.016	175.207	169.594	170.553	68.4387	188.322	100.438	77.6976	174.983	270.84	36.6973	55.3901	0.682866	42.8823	70.5309	57.7504	58.5254	70.5309	6.48379	53.5368	15.1522	70.5309	88.3292	43.8004	77.3644	64.8138	365.312	265.426	166.522	218.861	341.42	83.6049	91.3797	63.4186	124.698	341.42	219.495	92.2071
754.359	754.359	455.003	484.766	468.414	478.241	478.241	148.319	142.757	235.209	235.209	187.381	113.19	152.238	149.921	148.319	285.519	32.8314	119.289	142.62	97.5244	136.721	252.256	174.308	219.754	255.494	198.632	170.605	179.937	198.632	225.141	177.68	228.985	198.632	137.038	247.634	251.306	159.8	567.982	120.05	153.334	43.3388	545.086	141.555	138.419	279.811	317.249	545.086	0	293.657
754.359	754.359	455.003	484.766	468.414	478.241	478.241	148.319	142.757	235.209	235.209	187.381	113.19	152.238	149.921	148.319	285.519	32.8314	119.289	142.62	97.5244	136.721	252.256	174.308	219.754	255.494	198.632	170.605	179.937	198.632	225.141	177.68	228.985	198.632	137.038	247.634	251.306	159.8	567.982	120.05	153.334	43.3388	545.086	141.555	138.419	279.811	317.249	545.086	0	293.657
616.168	616.168	294.712	325.262	303.055	312.07	312.07	129.341	107.082	73.0391	73.0391	61.2702	112.889	134.521	128.675	129.341	116.543	141.832	56.9861	38.0283	127.824	224.532	78.5661	15.383	48.1966	81.9376	52.3576	14.6861	52.0027	52.3576	52.8494	43.135	55.4752	52.3576	40.2187	86.8006	90.7726	37.6651	401.164	218.339	126.285	170.933	377.626	35.5068	60.4662	111.447	167.533	377.626	173.698	136.762
614.441	614.441	277.871	306.304	271.355	276.716	276.716	257.77	236.035	138.063	138.063	175.22	243.556	262.533	256.867	257.77	45.3942	257.413	169.603	146.593	257.929	355.039	87.0777	141.349	87.8258	93.467	156.642	143.067	105.385	156.642	86.4293	108.49	91.6476	156.642	169.065	44.1926	144.966	127.15	355.657	348.229	253.897	293.537	331.746	164.708	146.874	43.29	37.1991	331.746	285.276	9.43819
754.359	754.359	455.003	484.766	468.414	478.241	478.241	148.319	142.757	235.209	235.209	187.381	113.19	152.238	149.921	148.319	285.519	32.8314	119.289	142.62	97.5244	136.721	252.256	174.308	219.754	255.494	198.632	170.605	179.937	198.632	225.141	177.68	228.985	198.632	137.038	247.634	251.306	159.8	567.982	120.05	153.334	43.3388	545.086	141.555	138.419	279.811	317.249	545.086	0	293.657
401.002	401.002	507.173	481.004	487.261	476.717	476.717	839.014	829.889	717.246	717.246	768.272	856.612	839.253	837.123	839.014	685.861	919.509	838.283	817.189	876.531	944.352	704.803	778.556	740.321	700.158	754.587	782.322	794.594	754.587	734.423	792.248	728.42	754.587	815.488	728.317	701.67	805.543	388.122	949.249	832.389	938.247	409.518	811.09	831.965	691.878	697.619	409.518	952.285	700.241
598.376	598.376	268.904	299.43	273.215	281.423	281.423	168.632	147.025	64.9469	64.9469	87.3033	156.402	173.355	167.706	168.632	71.6442	184.707	96.7093	73.9123	172.171	268.239	40.4753	52.8903	4.31646	46.5457	70.0205	55.0933	55.0431	70.0205	10.2752	49.8655	18.4188	70.0205	85.1431	45.1788	79.497	60.9657	369.088	262.653	164.707	215.482	345.203	80.4376	87.5393	66.5161	126.393	345.203	215.816	94.1813
141.258	141.258	195.976	168.697	207.95	206.288	206.288	480.445	479.504	403.49	403.49	437.135	509.234	478.586	478.564	480.445	431.775	588.834	528.543	514.176	527.719	570.011	420.034	466.899	453.59	412.644	431.587	470.463	512.296	431.587	448.127	506.095	439.114	431.587	497.216	466.428	385.774	511.453	171.711	579.422	474.195	593.109	184.03	494.071	536.683	436.245	485.116	184.03	620.182	467.176
172.051	172.051	248.052	217.774	241.1	233.501	233.501	573.092	567.946	471.227	471.227	514.811	596.715	572.285	571.174	573.092	471.625	669.616	598.185	580.263	616.236	671.905	474.014	535.755	509.934	467.633	504.98	539.526	568.656	504.98	504.046	564.04	496.121	504.98	570.138	511.597	453.913	573.269	152.597	679.125	566.541	680.849	176.051	566.305	599.779	477.056	508.959	176.051	702.147	499.203
605.997	605.997	276.099	306.6	279.98	288.077	288.077	171.21	149.35	72.5316	72.5316	91.9518	157.288	176.077	170.359	171.21	73.4107	181.864	93.2819	70.0851	172.458	269.048	47.0193	54.5882	11.4977	53.4947	75.4289	56.3334	47.7962	75.4289	17.1009	43.1606	25.9885	75.4289	84.4303	42.5941	87.2869	55.6683	375.475	262.975	167.524	213.74	351.552	79.8205	81.9498	67.9609	123.88	351.552	212.569	92.4049
76.778	76.778	298.495	273.633	314.34	313.692	313.692	546.33	549.141	489.996	489.996	516.331	578.854	543.549	544.54	546.33	530.26	662.011	610.673	598.767	595.979	624.025	513.09	550.946	544.734	505.428	513.802	554.296	602.202	513.802	539.602	595.32	530.28	513.802	577.958	562.242	472.631	598.521	279.724	635.633	540.548	660.55	293.183	575.337	622.54	534.3	587.753	293.183	691.848	567.67
665.319	665.319	333.451	363.761	335.035	342.488	342.488	196.76	174.477	130.978	130.978	135.225	172.087	202.358	196.45	196.76	109.718	166.563	84.1872	65.2351	181.966	278.388	104.292	89.5157	71.4954	111.609	123.82	88.5815	22.6753	123.82	76.571	31.3549	85.9088	123.82	97.834	67.2657	146.734	45.8579	428.051	268.856	194.852	205.603	403.982	94.9807	55.3432	103.709	125.095	403.982	192.309	104.281
576.904	576.904	240.625	269.89	237.191	243.55	243.55	231.568	210.87	100.555	100.555	144.979	222.901	235.816	230.436	231.568	5.07924	250.638	161.764	138.324	239.285	334.572	49.0711	119.381	64.4878	53.9674	125.441	121.986	105.618	125.441	60.5533	105.165	61.7959	125.441	152.753	37.3772	104.86	121.674	326.351	329.617	226.98	282.769	302.269	148.048	146.056	1.10376	73.6253	302.269	280.908	41.2519
72.3515	72.3515	266.137	237.353	274.158	270.878	270.878	553.789	553.299	477.492	477.492	511.452	583.063	551.797	551.917	553.789	502.552	663.006	602.777	588.251	601.425	641.433	492.836	541.052	526.776	485.536	505.859	544.63	585.637	505.859	521.251	579.573	512.325	505.859	571.512	538.235	459.764	585.259	218.71	651.316	547.591	666.792	236.206	568.353	610.614	507.212	553.057	236.206	694.272	536.716
401.002	401.002	507.173	481.004	487.261	476.717	476.717	839.014	829.889	717.246	717.246	768.272	856.612	839.253	837.123	839.014	685.861	919.509	838.283	817.189	876.531	944.352	704.803	778.556	740.321	700.158	754.587	782.322	794.594	754.587	734.423	792.248	728.42	754.587	815.488	728.317	701.67	805.543	388.122	949.249	832.389	938.247	409.518	811.09	831.965	691.878	697.619	409.518	952.285	700.241
640.593	640.593	317.56	348.148	324.77	333.526	333.526	139.313	116.983	97.3287	97.3287	82.9438	116.537	144.872	138.961	139.313	125.859	129.314	40.4842	17.3137	128.486	225.85	95.4768	38.1529	60.7351	100.176	76.481	35.7666	35.1084	76.481	66.4287	27.2195	71.8364	76.481	40.9415	89.931	115.007	13.9152	422.185	217.866	137.293	162.767	398.489	37.6597	35.9289	120.228	166.942	398.489	159.765	138.763
469.891	469.891	135.922	161.895	124.393	129.036	129.036	292.587	276.827	151.967	151.967	207.671	298.121	294.989	290.95	292.587	112.879	347.718	262.847	241.004	317.332	402.817	128.5	206.039	163.515	124.601	190.113	209.658	218.047	190.113	157.658	215.375	152.139	190.113	243.417	154.401	140.819	228.644	208.76	402.325	286.51	372.512	184.707	238.773	255.014	118.586	154.743	184.707	379.976	140.164
172.051	172.051	248.052	217.774	241.1	233.501	233.501	573.092	567.946	471.227	471.227	514.811	596.715	572.285	571.174	573.092	471.625	669.616	598.185	580.263	616.236	671.905	474.014	535.755	509.934	467.633	504.98	539.526	568.656	504.98	504.046	564.04	496.121	504.98	570.138	511.597	453.913	573.269	152.597	679.125	566.541	680.849	176.051	566.305	599.779	477.056	508.959	176.051	702.147	499.203
626.504	626.504	308.56	339.015	318.167	327.411	327.411	115.673	93.2791	85.4575	85.4575	60.0994	95.9687	121.111	115.205	115.673	135.366	123.473	41.6796	28.7028	109.998	207.111	96.9651	20.8418	67.0653	99.9288	57.3222	17.1382	59.4909	57.3222	71.7458	51.0776	74.148	57.3222	21.5001	104.478	103.031	38.4966	416.788	200.409	113.286	152.041	393.394	16.8981	54.0184	130.22	184.491	393.394	155.585	154.389
217.482	217.482	128.104	106.076	147.874	149.527	149.527	403.303	401.783	325.879	325.879	358.857	431.462	401.62	401.411	403.303	359.326	510.659	450.472	436.39	450.091	495.247	344.425	388.988	377.299	336.906	353.448	392.529	435.69	353.448	371.944	429.281	362.806	353.448	419.02	392.265	308.199	434.113	150.03	504.039	396.99	515.486	152.057	415.908	459.131	363.483	416.612	152.057	542.089	396.429
566.577	566.577	230.472	259.888	227.722	234.303	234.303	227.64	207.369	93.2994	93.2994	140.219	220.726	231.707	226.441	227.64	9.10072	252.179	163.652	140.393	237.625	332.072	42.7659	117.776	64.1386	46.4982	120.528	120.621	110.388	120.528	59.4796	109.109	59.0167	120.528	152.405	44.5685	96.275	124.737	317.886	327.663	222.843	283.129	293.796	147.655	149.885	11.083	83.0552	293.796	282.94	51.4881
626.504	626.504	308.56	339.015	318.167	327.411	327.411	115.673	93.2791	85.4575	85.4575	60.0994	95.9687	121.111	115.205	115.673	135.366	123.473	41.6796	28.7028	109.998	207.111	96.9651	20.8418	67.0653	99.9288	57.3222	17.1382	59.4909	57.3222	71.7458	51.0776	74.148	57.3222	21.5001	104.478	103.031	38.4966	416.788	200.409	113.286	152.041	393.394	16.8981	54.0184	130.22	184.491	393.394	155.585	154.389
577.33	577.33	241.091	270.391	237.79	244.184	244.184	230.571	209.856	99.8044	99.8044	144.033	221.84	234.827	229.443	230.571	6.0482	249.536	160.664	137.225	238.21	333.518	48.2785	118.311	63.4006	53.2719	124.507	120.91	104.581	124.507	59.4826	104.1	60.7799	124.507	151.657	36.4434	104.256	120.59	327.091	328.547	225.994	281.667	303.007	146.954	144.992	0	74.1781	303.007	279.811	41.6512
268.833	268.833	89.5641	60.2817	83.1258	77.1415	77.1415	420.27	413.292	312.274	312.274	357.233	441.408	420.006	418.358	420.27	315.687	511.893	439.085	421.028	461.154	523.287	315.189	376.712	350.985	308.683	346.61	380.491	409.858	346.61	345.12	405.074	337.081	346.61	411.418	354.522	295.076	414.071	49.2982	529	413.654	525.028	49.8328	407.513	440.559	320.882	359.718	49.8328	544.567	346.232
576.904	576.904	240.625	269.89	237.191	243.55	243.55	231.568	210.87	100.555	100.555	144.979	222.901	235.816	230.436	231.568	5.07924	250.638	161.764	138.324	239.285	334.572	49.0711	119.381	64.4878	53.9674	125.441	121.986	105.618	125.441	60.5533	105.165	61.7959	125.441	152.753	37.3772	104.86	121.674	326.351	329.617	226.98	282.769	302.269	148.048	146.056	1.10376	73.6253	302.269	280.908	41.2519
636.184	636.184	304.623	334.986	306.803	314.448	314.448	186.073	163.709	103.641	103.641	115.264	166.243	191.379	185.498	186.073	86.0854	175.319	87.3629	64.5341	178.83	276.222	75.2422	71.6556	42.6458	82.5004	101.318	71.8301	24.6934	101.318	47.5347	26.27	56.9444	101.318	90.441	44.7541	118.755	44.8919	400.642	268.308	183.287	211.331	376.605	86.5715	66.1051	80.051	116.855	376.605	203.799	90.1978
636.042	636.042	302.97	328.818	290.104	293.329	293.329	318.787	296.948	197.032	197.032	236.365	303.452	323.603	317.912	318.787	97.0937	310.694	225.199	203.038	317.106	414.458	145.416	202.15	149.041	150.933	217.652	203.711	159.438	217.652	147.602	164.18	152.504	217.652	228.234	105.21	202.01	182.96	362.9	406.975	314.997	348.802	339.867	224.044	199.213	97.7657	24.225	339.867	336.531	57.7369
260.761	260.761	104.64	92.5912	131.988	136.963	136.963	356.991	355.639	283.045	283.045	313.934	385.348	355.29	355.1	356.991	323.498	464.976	406.393	393.004	403.907	449.199	304.756	345.38	336.534	297.091	309.25	348.859	394.311	309.25	331.354	387.604	322.063	309.25	374.552	354.236	265.484	391.573	164.798	457.85	350.686	469.302	159.925	371.562	416.176	327.267	384.561	159.925	496.264	362.219
76.778	76.778	298.495	273.633	314.34	313.692	313.692	546.33	549.141	489.996	489.996	516.331	578.854	543.549	544.54	546.33	530.26	662.011	610.673	598.767	595.979	624.025	513.09	550.946	544.734	505.428	513.802	554.296	602.202	513.802	539.602	595.32	530.28	513.802	577.958	562.242	472.631	598.521	279.724	635.633	540.548	660.55	293.183	575.337	622.54	534.3	587.753	293.183	691.848	567.67
257.092	257.092	245.472	218.822	227.701	217.67	217.67	577.79	569.464	460.874	460.874	509.841	596.781	577.847	575.89	577.79	443.066	663.041	585.12	565.195	616.665	682.358	454.352	523.875	490.465	448.893	497.288	527.673	547.371	497.288	484.506	543.929	477.585	497.288	560.109	484.877	444.567	555.486	127.952	687.538	571.163	679.392	150.847	555.893	582.172	448.878	469.383	150.847	695.871	464.813
257.092	257.092	245.472	218.822	227.701	217.67	217.67	577.79	569.464	460.874	460.874	509.841	596.781	577.847	575.89	577.79	443.066	663.041	585.12	565.195	616.665	682.358	454.352	523.875	490.465	448.893	497.288	527.673	547.371	497.288	484.506	543.929	477.585	497.288	560.109	484.877	444.567	555.486	127.952	687.538	571.163	679.392	150.847	555.893	582.172	448.878	469.383	150.847	695.871	464.813
558.561	558.561	228.082	258.592	232.462	240.782	240.782	179.596	160.004	44.7267	44.7267	91.5372	175.738	183.429	178.314	179.596	57.4032	217.302	132.238	110.893	193.645	285.939	6.91425	76.4262	36.6934	6.15834	71.8047	79.8658	95.805	71.8047	30.9215	90.7291	22.8057	71.8047	113.504	59.3892	51.5255	100.644	328.792	282.588	174.554	244.104	304.978	108.782	127.338	55.1683	128.353	304.978	249.385	94.934
601.963	601.963	289.263	319.439	301.234	310.93	310.93	97.182	75.408	67.7074	67.7074	30.9891	86.6339	102.061	96.3312	97.182	139.969	134.682	65.6054	57.5917	104.089	197.986	94.4881	19.966	73.5981	95.162	32.4474	19.651	85.3578	32.4474	76.4709	76.5446	75.1561	32.4474	33.4401	116.457	83.9924	66.8614	400.647	193.621	93.5475	156.365	377.654	30.3318	83.012	135.613	197.813	377.654	167.505	165.817
641.132	641.132	314.645	345.232	320.099	328.482	328.482	156.234	133.857	99.1434	99.1434	94.333	134.149	161.727	155.816	156.234	112.574	143.848	55.085	31.7918	146.09	243.433	87.907	48.4088	51.8122	93.6116	84.7508	47.1214	19.1888	84.7508	57.7674	10.4363	64.9062	84.7508	58.4512	74.5135	116.339	13.9432	416.425	235.312	153.985	178.77	392.571	54.9718	40.0964	106.752	149.88	392.571	173.359	122.431
57.714	57.714	287.742	258.495	294.222	290.383	290.383	578.453	577.852	500.978	500.978	535.536	607.605	576.483	576.579	578.453	524.032	687.359	626.545	611.796	626.008	666.203	515.42	564.703	549.593	508.18	529.716	568.297	608.542	529.716	544.028	602.58	535.164	529.716	595.425	560.221	483.241	608.532	233.161	676.089	572.246	691.383	251.98	592.226	633.999	528.782	573.17	251.98	718.688	557.57
421.109	421.109	93.7689	115.581	75.3645	78.4178	78.4178	324.276	310.795	189.936	189.936	243.94	334.548	325.939	322.52	324.276	164.661	390.713	308.4	287.418	354.233	434.367	175.347	249.119	211.245	170.407	228.144	252.856	267.568	228.144	205.3	264.303	198.859	228.144	286.306	205.722	175.965	276.484	156.824	435.581	317.897	412.549	132.747	281.814	303.096	170.275	204.674	132.747	423.342	191.945
636.184	636.184	304.623	334.986	306.803	314.448	314.448	186.073	163.709	103.641	103.641	115.264	166.243	191.379	185.498	186.073	86.0854	175.319	87.3629	64.5341	178.83	276.222	75.2422	71.6556	42.6458	82.5004	101.318	71.8301	24.6934	101.318	47.5347	26.27	56.9444	101.318	90.441	44.7541	118.755	44.8919	400.642	268.308	183.287	211.331	376.605	86.5715	66.1051	80.051	116.855	376.605	203.799	90.1978
562.166	562.166	251.502	281.433	265.095	275.102	275.102	105.567	87.9029	37.6597	37.6597	18.3418	109.081	108.897	104.127	105.567	132.69	170.88	105.225	94.6825	128.61	214.569	82.3304	47.759	77.7607	79.6911	9.52486	50.5045	112.346	9.52486	77.6226	103.657	71.6827	9.52486	73.1466	121.239	49.7752	99.3313	364.806	213.194	100.07	187.664	342.181	70.1265	119.655	129.731	199.888	342.181	203.616	166.458
76.778	76.778	298.495	273.633	314.34	313.692	313.692	546.33	549.141	489.996	489.996	516.331	578.854	543.549	544.54	546.33	530.26	662.011	610.673	598.767	595.979	624.025	513.09	550.946	544.734	505.428	513.802	554.296	602.202	513.802	539.602	595.32	530.28	513.802	577.958	562.242	472.631	598.521	279.724	635.633	540.548	660.55	293.183	575.337	622.54	534.3	587.753	293.183	691.848	567.67
401.002	401.002	507.173	481.004	487.261	476.717	476.717	839.014	829.889	717.246	717.246	768.272	856.612	839.253	837.123	839.014	685.861	919.509	838.283	817.189	876.531	944.352	704.803	778.556	740.321	700.158	754.587	782.322	794.594	754.587	734.423	792.248	728.42	754.587	815.488	728.317	701.67	805.543	388.122	949.249	832.389	938.247	409.518	811.09	831.965	691.878	697.619	409.518	952.285	700.241
199.468	199.468	303.849	274.263	292.97	284.289	284.289	632.641	626.675	525.989	525.989	571.518	655.111	632.039	630.723	632.641	518.747	726.17	652.345	633.623	674.77	732.876	525.186	590.185	561.317	519.164	560.774	593.977	619.443	560.774	555.379	615.317	547.844	560.774	625.321	559.748	508.96	625.536	197.364	739.689	626.058	738.971	221.453	621.344	652.184	524.384	550.288	221.453	758.851	543.426
636.184	636.184	304.623	334.986	306.803	314.448	314.448	186.073	163.709	103.641	103.641	115.264	166.243	191.379	185.498	186.073	86.0854	175.319	87.3629	64.5341	178.83	276.222	75.2422	71.6556	42.6458	82.5004	101.318	71.8301	24.6934	101.318	47.5347	26.27	56.9444	101.318	90.441	44.7541	118.755	44.8919	400.642	268.308	183.287	211.331	376.605	86.5715	66.1051	80.051	116.855	376.605	203.799	90.1978
214.542	214.542	216.129	202.703	243.163	247.451	247.451	407.494	411.874	366.461	366.461	385.412	441.321	404.394	405.752	407.494	423.124	525.598	480.726	471.162	457.726	482.149	397.243	423.589	425.434	389.401	385.456	426.678	480.219	385.456	420.859	472.643	411.347	385.456	447.305	449.431	349.969	473.393	257.299	493.99	401.938	521.606	259.099	445.143	495.825	426.211	488.517	259.099	554.509	463.719
489.569	489.569	169.377	189.426	147.922	148.341	148.341	343.095	325.934	200.417	200.417	256.062	345.006	345.94	341.551	343.095	135.353	386.644	298.944	275.959	363.582	452.616	166.995	247.316	198.275	165.191	237.396	250.676	245.949	237.396	192.891	245.148	189.542	237.396	284.076	177.261	191.755	260.845	210.216	450.912	337.27	415.001	187.563	279.318	285.985	141.38	148.955	187.563	418.023	147.005
214.542	214.542	216.129	202.703	243.163	247.451	247.451	407.494	411.874	366.461	366.461	385.412	441.321	404.394	405.752	407.494	423.124	525.598	480.726	471.162	457.726	482.149	397.243	423.589	425.434	389.401	385.456	426.678	480.219	385.456	420.859	472.643	411.347	385.456	447.305	449.431	349.969	473.393	257.299	493.99	401.938	521.606	259.099	445.143	495.825	426.211	488.517	259.099	554.509	463.719
76.778	76.778	298.495	273.633	314.34	313.692	313.692	546.33	549.141	489.996	489.996	516.331	578.854	543.549	544.54	546.33	530.26	662.011	610.673	598.767	595.979	624.025	513.09	550.946	544.734	505.428	513.802	554.296	602.202	513.802	539.602	595.32	530.28	513.802	577.958	562.242	472.631	598.521	279.724	635.633	540.548	660.55	293.183	575.337	622.54	534.3	587.753	293.183	691.848	567.67
520.094	520.094	200.018	230.379	211.451	221.197	221.197	156.182	140.863	23.4595	23.4595	73.2246	163.826	158.619	154.545	156.182	105.563	224.228	150.498	134.307	183.495	266.44	59.9468	87.998	80.7781	52.9887	58.5765	91.7244	135.321	58.5765	76.7456	128.114	67.3022	58.5765	122.205	112.869	5.84403	131.524	310.933	266.29	150.113	242.671	288.041	118.279	156.504	104.993	179.169	288.041	257.058	146.365
672.425	672.425	338.211	368.173	337.466	344.319	344.319	220.416	198.099	146.125	146.125	156.279	195.944	225.987	220.076	220.416	106.686	187.551	107.496	89.0692	205.68	301.896	112.351	111.142	84.0132	120.085	143.487	110.57	46.0129	143.487	88.1197	54.2973	97.6287	143.487	121.604	66.0566	160.694	69.6986	428.032	292.124	218.401	227.465	403.945	118.663	77.5373	100.982	108.066	403.945	211.89	92.1943
76.778	76.778	298.495	273.633	314.34	313.692	313.692	546.33	549.141	489.996	489.996	516.331	578.854	543.549	544.54	546.33	530.26	662.011	610.673	598.767	595.979	624.025	513.09	550.946	544.734	505.428	513.802	554.296	602.202	513.802	539.602	595.32	530.28	513.802	577.958	562.242	472.631	598.521	279.724	635.633	540.548	660.55	293.183	575.337	622.54	534.3	587.753	293.183	691.848	567.67
257.092	257.092	245.472	218.822	227.701	217.67	217.67	577.79	569.464	460.874	460.874	509.841	596.781	577.847	575.89	577.79	443.066	663.041	585.12	565.195	616.665	682.358	454.352	523.875	490.465	448.893	497.288	527.673	547.371	497.288	484.506	543.929	477.585	497.288	560.109	484.877	444.567	555.486	127.952	687.538	571.163	679.392	150.847	555.893	582.172	448.878	469.383	150.847	695.871	464.813
636.034	636.034	348.721	377.287	366.423	376.942	376.942	30.2852	24.4524	145.607	145.607	89.8489	8.1408	35.4673	31.4977	30.2852	228.514	92.8026	98.6084	112.677	24.0546	109.45	182.207	106.35	161.591	182.004	107.88	104.24	156.048	107.88	164.826	148.671	163.684	107.88	80.5988	203.019	157.452	131.85	465.906	105.848	34.0617	89.4374	444.148	84.2346	130.473	224.127	283.946	444.148	120.009	252.899
[truncated: 53 more columns]

## Sheet: GD_all2
1	102	1	102	1	102
	Genotypes	Codominant Genotypic Distance	Pop1
BGWMA02	BGWMA03	JM003	JM004	JM012	J003	J004	LYRU001	LYRU003	LYRU004	LYRU005	LYRU006	LYRU007	LYRU008	LYRU009	LYRU010	LYRU011	LYRU012	LYRU013	LYRU014	LYRU015	LYRU016	LYRU017	LYRU018	LYRU019	LYRU020	LYRU021	LYRU024	LYRU025	LYRU026	LYRU027	LYRU028	LYRU029	LYRU030	LYRU031	LYRU032	LYRU034	LYRU035	LYRU036	LYRU038	LYRU039	LYRU040	LYRU041	LYRU043	LYRU044	LYRU047	LYRU051	LYRU059	LYRU066	LYRU067
0
18	0
18	22	0
27	19	22	0
21	24	11	20	0
24	25	20	27	21	0
17	21	16	26	21	17	0
24	23	24	28	23	19	22	0
25	24	23	23	23	21	24	11	0
18	19	18	25	22	19	19	15	16	0
17	18	19	20	21	17	17	17	18	9	0
20	19	20	23	24	18	20	18	15	11	12	0
26	24	22	27	21	19	23	19	21	17	17	19	0
20	23	21	23	19	22	24	17	16	16	16	18	15	0
26	21	24	28	25	21	25	14	18	12	19	17	17	18	0
22	18	20	22	20	19	18	13	17	9	13	15	13	17	6	0
24	25	23	24	26	26	23	19	20	18	17	21	22	16	20	15	0
19	23	20	23	24	20	20	16	14	11	14	15	18	13	16	15	17	0
27	24	24	28	25	24	25	17	19	12	19	18	16	15	14	12	18	19	0
23	22	23	25	26	21	24	21	20	18	18	17	20	15	16	19	20	14	17	0
20	17	22	25	24	16	21	17	17	13	12	13	17	15	16	14	20	16	16	12	0
23	22	21	26	23	22	21	21	16	9	17	13	23	18	13	12	22	17	16	19	15	0
23	23	22	25	26	20	23	20	20	12	17	15	19	20	17	13	19	18	19	17	18	19	0
22	17	25	22	27	24	23	20	19	19	16	19	23	15	20	16	16	19	22	19	15	21	21	0
24	19	24	23	25	22	23	15	16	10	18	17	20	17	9	7	20	16	15	20	13	12	16	15	0
18	20	18	25	21	20	18	16	17	10	11	13	16	14	13	10	16	16	12	16	12	15	17	14	14	0
23	21	21	24	27	20	21	19	19	10	16	14	18	18	14	9	17	15	13	20	17	16	13	18	9	14	0
25	25	20	25	24	26	27	20	19	15	21	16	24	19	15	15	24	17	18	22	20	16	19	23	13	19	13	0
24	21	21	24	23	19	22	18	16	11	16	16	15	16	12	8	17	16	14	20	15	11	11	18	9	15	9	12	0
20	18	21	22	25	16	20	15	16	10	12	14	13	15	12	11	18	11	17	16	12	18	15	15	10	12	9	16	13	0
18	19	19	28	23	19	19	16	17	10	10	16	18	17	17	13	21	15	19	22	16	15	18	16	18	12	17	21	13	12	0
22	21	24	27	26	23	22	17	18	15	18	16	21	18	15	15	19	19	17	17	15	16	21	14	14	10	18	22	18	15	16	0
22	25	21	28	24	18	19	17	20	16	17	17	20	20	22	18	23	20	20	16	18	21	15	21	20	15	17	22	18	17	19	14	0
20	21	22	23	24	18	21	12	15	14	17	13	17	13	14	14	16	15	18	19	14	16	15	15	14	15	17	20	15	15	16	12	19	0
26	21	25	20	22	19	20	19	16	15	15	16	18	18	16	12	20	19	19	20	17	14	20	16	12	16	17	22	16	15	18	14	21	13	0
23	20	21	23	22	14	20	14	12	14	12	12	19	18	19	16	21	14	20	19	15	16	16	18	18	14	17	20	15	11	11	19	17	16	16	0
20	21	20	24	23	21	20	18	15	12	15	12	21	17	12	11	21	13	19	18	16	11	20	18	11	15	14	11	13	14	16	16	18	17	16	15	0
25	22	24	26	25	22	23	18	16	14	19	17	21	21	14	13	23	16	19	21	21	14	16	20	12	16	15	15	13	12	14	16	21	16	12	12	16	0
23	18	21	25	24	19	20	16	15	13	17	14	16	16	11	13	18	17	15	17	13	13	18	17	11	14	16	19	15	12	14	11	19	11	12	16	11	14	0
25	23	21	22	23	19	24	19	14	16	19	17	18	17	16	14	13	18	16	19	19	17	17	18	14	16	13	17	10	15	18	17	18	18	17	17	17	14	16	0
24	20	23	23	23	20	19	17	17	14	16	14	18	18	17	13	23	18	20	21	15	15	19	18	14	14	16	18	14	12	16	17	17	16	17	12	11	16	12	18	0
22	15	26	25	27	24	19	22	22	14	17	20	19	19	17	12	22	20	18	21	15	19	18	15	12	16	13	20	11	14	16	19	20	18	16	19	18	16	16	18	16	0
20	23	23	26	26	21	22	20	14	16	15	17	19	17	23	18	19	15	22	19	14	19	20	16	20	15	20	25	19	14	15	18	20	15	20	15	21	17	18	16	15	22	0
21	22	23	27	25	27	23	23	22	19	16	20	23	16	23	19	20	21	25	18	19	18	21	16	22	17	24	26	22	20	14	18	21	17	19	20	20	21	19	23	21	22	18	0
20	20	21	21	25	20	19	21	17	13	10	12	20	16	20	15	15	15	16	15	13	16	19	16	18	12	15	21	17	13	18	17	18	16	18	17	17	20	17	18	18	17	14	20	0
24	19	27	27	27	25	20	26	23	19	16	19	23	22	25	20	28	24	26	22	19	20	21	20	22	19	24	28	21	20	16	16	15	22	19	18	19	23	18	24	17	17	22	17	22	0
25	21	23	27	25	17	22	19	20	15	17	16	23	21	21	19	25	21	23	16	17	22	15	22	20	20	20	26	21	17	20	22	20	17	22	19	22	23	20	23	19	21	19	19	17	20	0
25	23	23	29	28	19	25	23	21	18	20	17	24	20	22	22	23	22	22	15	17	16	18	19	21	19	21	26	20	17	18	19	19	19	21	15	21	20	17	18	22	24	20	17	18	19	18	0
23	23	24	21	23	18	23	21	17	19	15	17	21	19	21	18	20	16	24	18	16	20	21	21	19	18	20	22	15	16	18	22	22	20	18	13	18	17	21	15	17	19	17	23	16	25	23	20	0
18	16	25	26	28	22	17	21	22	21	16	19	20	17	20	18	21	20	24	19	15	24	20	17	19	16	18	22	18	13	19	19	20	17	20	17	20	19	18	21	17	12	18	21	17	21	22	24	19	0
29	27	25	24	26	24	28	19	19	19	17	17	19	25	25	21	28	23	25	27	22	26	21	27	27	22	25	20	23	21	19	27	25	20	26	16	25	26	24	25	21	27	20	27	21	25	20	28	24	26
21	21	22	21	22	18	21	16	14	13	13	13	18	13	16	16	16	12	16	10	11	12	19	16	15	14	18	20	14	13	16	13	19	12	12	13	13	16	12	16	15	18	16	19	11	21	19	16	13	19
18	21	21	21	22	20	20	17	15	13	11	15	17	9	21	16	15	9	18	17	13	19	20	15	15	14	16	20	17	10	14	18	20	14	16	15	16	20	17	19	18	19	14	15	11	20	18	20	18	16
22	26	25	26	25	20	26	19	19	19	17	16	20	15	22	21	20	16	23	18	17	23	23	18	21	17	20	22	22	16	21	19	23	12	17	18	20	20	19	21	20	26	14	20	18	28	23	20	18	21
24	21	23	28	26	20	23	18	18	11	15	15	16	18	16	13	20	18	13	15	12	16	10	20	15	13	16	21	11	16	15	16	15	14	17	18	20	20	14	18	19	17	18	19	17	16	15	17	24	21
23	26	24	27	23	20	22	16	17	19	18	21	20	17	18	15	17	18	20	19	15	19	24	19	19	14	24	20	19	20	22	17	21	15	20	17	17	24	19	22	18	23	20	21	18	27	25	23	19	21
25	20	22	22	23	23	23	17	18	17	16	14	15	14	20	15	16	19	17	19	15	21	18	16	18	16	16	20	15	14	16	17	21	11	17	16	19	18	15	17	16	17	18	19	15	19	19	19	20	19
23	17	22	19	24	19	20	20	16	15	13	14	18	16	17	13	21	19	21	19	12	14	19	12	10	17	15	19	13	11	14	14	20	14	8	15	13	16	11	15	15	13	21	17	16	15	20	15	18	16
21	21	18	20	22	18	20	15	15	15	13	14	19	14	20	16	19	12	19	16	17	20	18	17	19	17	17	19	17	15	16	21	17	18	19	15	16	21	18	16	19	22	19	21	15	23	20	21	19	21
22	17	20	25	21	22	20	20	20	12	12	15	21	16	15	13	21	20	21	21	15	14	19	16	12	15	15	18	16	14	13	16	20	16	17	17	12	17	11	19	14	17	19	16	15	18	20	20	20	17
22	21	22	25	25	18	20	22	19	15	13	14	19	18	21	16	25	17	22	20	15	16	19	18	18	15	15	21	14	12	10	19	20	21	18	11	16	16	17	19	15	18	18	22	17	16	22	14	15	20
22	20	21	21	24	16	18	20	17	16	16	13	22	18	21	18	19	17	20	19	14	17	19	18	18	17	17	18	16	15	16	19	18	19	20	13	14	18	15	12	16	21	19	23	17	20	22	18	18	19
26	22	26	24	25	21	20	17	19	20	17	17	18	20	20	16	23	20	19	20	18	24	21	21	20	18	19	20	16	17	20	20	18	19	20	17	17	20	19	19	15	18	22	26	19	21	22	26	20	16
24	24	24	27	27	23	23	23	20	19	16	16	15	15	23	20	21	21	20	20	13	22	19	22	23	15	21	26	19	15	20	20	22	16	21	17	23	24	17	21	17	21	13	20	15	23	21	23	20	14
23	21	23	21	21	20	23	15	13	16	13	17	14	12	16	15	16	14	18	19	15	18	21	17	15	15	19	20	14	10	13	16	21	15	17	15	16	18	13	14	16	20	15	19	14	17	20	20	17	19
20	20	20	18	21	17	20	19	14	16	13	14	13	10	20	16	18	16	17	17	11	18	18	15	15	15	17	20	13	13	14	16	18	12	14	15	17	17	12	11	14	17	12	17	14	16	19	18	13	17
19	19	20	23	20	17	18	14	15	15	15	15	18	13	16	14	20	15	19	16	12	14	19	17	16	15	20	19	15	16	15	17	17	12	16	16	14	16	13	17	12	16	15	17	15	19	16	17	14	17
20	19	22	25	23	21	23	16	15	15	13	15	16	13	21	17	19	16	18	18	12	19	19	16	17	14	19	22	18	14	13	16	20	14	18	13	19	19	15	18	16	20	10	13	15	19	19	20	16	18
19	20	21	26	23	13	21	16	17	15	13	14	16	14	17	16	20	19	19	18	13	19	16	16	16	13	16	20	14	11	11	17	19	12	15	13	18	16	13	17	16	18	17	19	15	21	16	15	16	15
25	23	24	22	23	21	24	19	17	17	18	14	17	13	16	16	19	15	20	15	15	16	22	16	17	17	20	21	16	16	20	16	22	10	14	19	15	19	14	18	17	20	19	22	15	21	21	20	18	23
25	21	24	21	25	18	23	21	13	18	18	17	20	16	22	19	20	20	23	21	13	16	20	16	18	19	20	22	13	14	16	19	20	17	19	13	17	18	13	15	14	17	16	22	16	19	21	17	16	19
22	22	24	27	24	21	24	18	18	18	15	19	18	13	20	18	18	19	21	21	15	23	16	15	17	15	20	23	17	11	12	17	20	15	20	13	21	16	15	17	17	20	12	18	18	20	20	21	19	15
24	21	22	24	23	21	23	20	14	13	18	13	18	18	17	15	20	17	20	17	13	12	15	18	12	18	17	18	10	16	19	13	20	11	12	17	15	13	13	14	18	17	17	22	15	22	20	17	16	21
21	19	24	22	25	22	24	21	15	16	16	14	20	15	18	17	20	17	21	16	12	14	20	14	13	16	18	18	13	16	17	12	20	11	12	18	14	15	13	15	18	14	19	18	15	19	20	20	16	18
21	19	20	25	23	21	21	12	11	10	12	13	19	18	15	11	20	15	15	17	12	12	18	17	14	14	17	18	14	14	10	15	20	14	17	12	13	16	15	17	16	18	16	19	15	19	18	18	19	20
24	19	22	25	25	21	24	22	15	17	18	13	20	17	22	19	23	21	20	18	15	18	19	14	17	15	16	20	16	16	19	16	15	17	17	17	17	19	15	15	19	15	19	22	11	22	22	17	19	20
24	24	24	28	21	23	22	19	19	22	20	19	17	15	22	19	23	22	20	23	16	23	25	20	21	15	24	26	22	18	17	15	21	15	18	21	23	20	16	20	20	25	18	20	18	23	27	24	21	21
23	20	25	27	28	24	23	25	24	16	13	15	18	20	21	18	25	23	21	23	17	19	21	18	20	15	21	25	19	18	13	17	24	16	15	17	19	18	13	21	18	19	19	17	21	16	22	21	22	20
27	25	26	28	30	23	27	24	19	20	21	19	21	21	26	24	20	23	27	24	18	18	24	17	23	22	23	28	19	21	19	21	24	15	22	18	23	24	18	20	22	22	20	22	20	23	23	17	24	25
23	22	24	17	22	19	18	19	16	14	16	15	20	14	17	15	16	16	17	16	16	13	22	16	15	14	18	22	18	15	19	13	21	14	10	17	15	18	13	14	15	21	18	20	16	21	21	20	18	19
21	20	25	26	26	16	24	19	18	15	15	13	22	17	20	18	20	17	20	17	12	15	18	16	20	18	20	22	16	17	15	18	21	11	19	15	18	19	16	21	19	20	16	20	11	24	16	17	19	18
22	24	24	23	26	19	20	19	19	20	18	17	16	18	23	20	22	18	23	19	17	22	21	20	20	18	20	20	19	18	21	19	17	17	21	17	21	22	20	17	17	22	18	22	19	23	22	22	18	18
21	20	21	20	21	16	18	17	15	13	12	14	17	17	16	11	14	17	18	15	11	13	14	14	13	13	15	22	11	13	15	13	17	12	9	14	16	15	12	15	16	15	15	18	12	19	17	16	15	18
26	23	26	26	23	24	25	22	20	19	20	17	21	18	17	16	26	20	25	22	19	15	22	19	12	20	21	20	16	17	19	18	25	15	13	17	15	11	14	17	17	19	21	22	21	23	25	21	18	19
23	22	18	22	18	25	28	21	21	24	23	20	20	17	23	22	24	22	23	23	19	23	25	23	23	20	25	21	22	20	22	21	26	14	20	23	25	21	18	23	22	27	20	19	21	27	26	23	24	23
24	20	24	25	27	21	24	21	17	10	16	12	18	17	17	15	20	17	13	17	14	13	14	16	15	13	13	18	10	15	16	14	18	14	16	16	18	15	13	15	18	14	17	22	14	22	18	19	22	19
23	18	24	23	27	20	24	23	19	17	15	15	17	16	20	18	22	17	19	16	15	20	19	14	19	16	16	20	14	14	16	16	20	16	19	16	18	17	16	15	18	15	17	20	14	21	18	19	18	15
21	25	24	27	26	24	30	20	19	20	19	23	27	20	26	25	24	19	26	20	18	25	25	24	21	20	23	25	24	18	22	19	20	22	23	19	24	23	23	24	24	29	21	25	23	27	26	28	20	23
20	18	19	22	22	18	18	20	19	12	11	13	16	16	17	13	17	15	19	15	13	15	16	14	16	15	15	21	15	12	15	16	16	16	17	15	14	19	15	17	16	18	14	18	10	18	15	16	20	18
24	23	23	22	24	19	25	19	16	17	14	14	20	16	21	20	23	18	16	15	14	20	19	19	19	17	18	20	18	18	20	19	18	16	17	16	19	21	18	17	20	20	21	22	16	21	19	22	18	21
21	19	20	25	21	21	21	16	17	16	15	13	18	13	20	18	18	15	19	17	13	19	20	17	17	13	19	19	19	14	17	12	16	13	19	15	16	17	13	17	16	23	15	17	14	19	21	18	21	18
22	23	21	25	20	17	22	17	17	15	14	15	20	14	19	19	23	18	23	17	15	16	18	20	17	16	20	21	19	17	20	16	15	14	16	16	18	18	15	18	18	23	18	21	17	23	22	21	20	19
24	23	24	24	28	21	23	22	20	20	17	17	14	18	20	17	19	18	22	17	15	22	22	15	19	17	18	20	20	14	21	18	21	17	16	19	20	23	18	20	21	22	20	21	16	25	24	20	21	19
22	23	25	26	25	19	23	19	14	18	16	16	20	20	18	16	22	18	22	17	15	21	21	20	18	16	20	19	20	17	20	16	22	15	13	18	17	18	17	19	19	22	16	23	17	24	21	24	16	20
25	20	26	21	26	20	24	22	18	16	14	14	21	19	21	17	24	20	23	21	14	18	19	18	18	16	20	19	16	17	19	19	22	16	18	16	19	20	18	19	19	18	20	24	13	19	18	21	21	20
23	23	22	24	24	21	20	20	19	16	16	15	20	21	18	17	23	20	21	19	16	17	18	20	19	17	19	17	17	15	20	18	18	15	19	16	17	18	17	19	14	21	18	23	16	23	21	22	21	19
26	23	25	24	26	19	21	19	20	18	15	14	21	20	20	19	23	19	19	18	17	21	21	21	21	18	19	21	20	14	18	14	14	16	16	14	17	16	15	21	16	22	21	24	16	16	21	22	22	19
31	29	24	24	24	27	28	23	24	21	21	20	16	21	24	21	24	22	19	25	23	27	25	27	25	21	22	17	22	21	23	24	26	19	22	25	25	24	21	23	25	26	26	24	21	28	26	29	28	27
25	23	24	24	24	17	20	22	20	18	16	15	13	21	17	13	25	16	22	19	14	20	19	21	17	16	19	21	15	14	20	21	21	19	16	15	14	18	16	20	15	18	20	26	17	19	23	21	16	20
23	26	27	28	30	26	27	25	23	18	17	17	18	17	24	22	23	17	21	19	18	21	24	20	19	19	20	22	21	17	21	19	24	18	21	22	19	21	18	21	22	24	18	22	15	25	23	25	24	21
21	19	24	29	25	19	20	18	20	19	16	18	20	18	24	20	20	21	22	21	13	22	23	18	22	16	20	25	20	19	20	20	21	15	21	16	21	25	18	23	20	16	18	21	16	19	22	23	22	15
23	22	23	26	23	23	23	22	16	20	19	18	21	16	21	18	23	20	22	16	19	21	18	19	20	13	20	22	19	16	17	18	16	20	19	17	19	16	19	17	18	19	16	17	15	18	21	18	17	20
[truncated: 53 more columns]

## Sheet: R_2
Results of Spatial Structure Analysis
Genetic Distance	GD_all2
Geographic Distance	GGD_all2
Data Title
No. Samples	102
Even Distance Classes (Size = 5)
No. Dist. Classes	50
No. Permutations	999
No. Bootstraps	1000
n	50	25	14	24	29	18	35	42	72	38	52	66	62	55	69	67	63	84	68	64	81	76	77	64	73	60	50	56	61	65	68	52	42	48	66	49	31	35	29	49	49	32	40	52	40	49	36	38	43
Distance Class (End Point)	5	10	15	20	25	30	35	40	45	50	55	60	65	70	75	80	85	90	95	100	105	110	115	120	125	130	135	140	145	150	155	160	165	170	175	180	185	190	195	200	205	210	215	220	225	230	235	240	245
r	0.0842664	-0.0269635	0.0391582	0.0247103	0.0181721	0.0184875	0.0696607	0.0381426	0.0152796	0.0141359	0.00740927	0.0261379	-0.00671968	0.0325323	-0.0152761	-0.0442532	1.74703e-05	0.0215779	0.00139691	-0.0194871	-0.0140903	0.0116316	0.000182792	-0.0120231	0.0107948	-0.0167551	0.0200664	0.00149535	0.0155299	-0.00110831	0.0300434	-0.0020164	-0.00044837	0.0563968	0.023358	-0.0402576	0.0175289	-0.0156326	0.059156	0.009963	0.0202016	0.036826	-0.00637598	-0.0247916	0.00873485	-0.0192238	-0.029393	0.00746596	-0.0113357
U	0.0378909	0.0508042	0.0711557	0.0532217	0.0491959	0.0649386	0.044664	0.0389304	0.0310627	0.0443872	0.0344006	0.0317669	0.029942	0.0346549	0.0299197	0.030639	0.0304163	0.0289344	0.0313613	0.0332532	0.0283483	0.0277157	0.0288399	0.0332682	0.0293782	0.0336095	0.0364384	0.0349318	0.0305415	0.0311457	0.0333535	0.0379293	0.0399068	0.0351136	0.0295933	0.0378863	0.0451118	0.0439553	0.0526057	0.0337748	0.0381526	0.0456552	0.0448784	0.0336513	0.0417501	0.0366455	0.0429501	0.0452206	0.0398324
L	-0.0330069	-0.0469428	-0.0625368	-0.0527306	-0.0472238	-0.0602037	-0.0420913	-0.0385383	-0.0313946	-0.041944	-0.0350438	-0.0321638	-0.0326337	-0.0340458	-0.0307088	-0.0281211	-0.0314889	-0.0293612	-0.0303278	-0.0306956	-0.0271491	-0.0283395	-0.0305942	-0.029687	-0.0289716	-0.0336076	-0.0345346	-0.030975	-0.0323099	-0.0311645	-0.0296533	-0.0343373	-0.0374049	-0.036949	-0.0311835	-0.0358127	-0.0465904	-0.0421144	-0.0485007	-0.0349026	-0.0373674	-0.0455164	-0.0398623	-0.0383791	-0.0409103	-0.0354767	-0.0422063	-0.0363898	-0.0359441
P(r-rand >= r-data)	0.001	0.862	0.122	0.181	0.238	0.268	0.004	0.031	0.158	0.247	0.348	0.057	0.63	0.036	0.829	1	0.483	0.074	0.457	0.884	0.849	0.193	0.486	0.755	0.237	0.817	0.147	0.484	0.165	0.555	0.042	0.537	0.48	0.003	0.072	0.991	0.218	0.752	0.01	0.291	0.137	0.061	0.596	0.918	0.334	0.865	0.919	0.368	0.74
P(r-rand <= r-data)	1	0.139	0.879	0.82	0.763	0.733	0.997	0.97	0.843	0.754	0.653	0.944	0.371	0.965	0.172	0.001	0.518	0.927	0.544	0.117	0.152	0.808	0.515	0.246	0.764	0.184	0.854	0.517	0.836	0.446	0.959	0.464	0.521	0.998	0.929	0.01	0.783	0.249	0.991	0.71	0.864	0.94	0.405	0.083	0.667	0.136	0.082	0.633	0.261
Correction	0.00990099	0.00990099	0.00990099	0.00990099	0.00990099	0.00990099	0.00990099	0.00990099	0.00990099	0.00990099	0.00990099	0.00990099	0.00990099	0.00990099	0.00990099	0.00990099	0.00990099	0.00990099	0.00990099	0.00990099	0.00990099	0.00990099	0.00990099	0.00990099	0.00990099	0.00990099	0.00990099	0.00990099	0.00990099	0.00990099	0.00990099	0.00990099	0.00990099	0.00990099	0.00990099	0.00990099	0.00990099	0.00990099	0.00990099	0.00990099	0.00990099	0.00990099	0.00990099	0.00990099	0.00990099	0.00990099	0.00990099	0.00990099	0.00990099
r uc	0.0743654	-0.0368645	0.0292572	0.0148093	0.00827115	0.00858654	0.0597597	0.0282416	0.0053786	0.00423487	-0.00249172	0.0162369	-0.0166207	0.0226313	-0.0251771	-0.0541542	-0.00988352	0.0116769	-0.00850408	-0.0293881	-0.0239913	0.00173066	-0.0097182	-0.0219241	0.00089381	-0.0266561	0.0101655	-0.00840564	0.00562887	-0.0110093	0.0201424	-0.0119174	-0.0103494	0.0464959	0.013457	-0.0501586	0.00762795	-0.0255336	0.0492551	6.20144e-05	0.0103006	0.026925	-0.016277	-0.0346926	-0.00116614	-0.0291248	-0.0392939	-0.00243503	-0.0212366
U uc	0.0279899	0.0409033	0.0612547	0.0433207	0.0392949	0.0550376	0.034763	0.0290294	0.0211617	0.0344862	0.0244996	0.0218659	0.020041	0.0247539	0.0200187	0.020738	0.0205153	0.0190334	0.0214603	0.0233522	0.0184473	0.0178147	0.0189389	0.0233672	0.0194772	0.0237085	0.0265375	0.0250308	0.0206405	0.0212447	0.0234525	0.0280283	0.0300058	0.0252126	0.0196923	0.0279854	0.0352108	0.0340543	0.0427047	0.0238738	0.0282516	0.0357542	0.0349774	0.0237504	0.0318492	0.0267445	0.0330492	0.0353196	0.0299314
L uc	-0.0429079	-0.0568438	-0.0724378	-0.0626316	-0.0571248	-0.0701046	-0.0519923	-0.0484392	-0.0412956	-0.0518449	-0.0449448	-0.0420647	-0.0425347	-0.0439468	-0.0406098	-0.0380221	-0.0413899	-0.0392622	-0.0402288	-0.0405966	-0.0370501	-0.0382405	-0.0404952	-0.039588	-0.0388726	-0.0435086	-0.0444356	-0.040876	-0.0422109	-0.0410655	-0.0395543	-0.0442383	-0.0473059	-0.04685	-0.0410844	-0.0457137	-0.0564914	-0.0520154	-0.0584017	-0.0448036	-0.0472684	-0.0554174	-0.0497633	-0.0482801	-0.0508113	-0.0453776	-0.0521073	-0.0462908	-0.0458451
Mean Bootstrap r	0.08526	-0.0243208	0.0393982	0.0240124	0.0186966	0.0193299	0.0669926	0.0409625	0.0167658	0.0149767	0.00794723	0.025816	-0.00581115	0.0325998	-0.0165558	-0.0442376	-0.000850662	0.022924	0.00121292	-0.022885	-0.0129649	0.0110806	0.000633665	-0.0151127	0.0108166	-0.0172395	0.0206505	-0.000918687	0.0159696	-0.00141367	0.0309402	-0.00212094	-0.000271097	0.0545873	0.0224912	-0.0389639	0.0158341	-0.014789	0.0591949	0.0108072	0.0199724	0.0354614	-0.00653992	-0.0241918	0.00481891	-0.0183566	-0.0282035	0.00585109	-0.00962265
Ur error	0.0500241	0.0479931	0.0560656	0.0391103	0.0575573	0.0682335	0.0636093	0.0406161	0.0402343	0.0403466	0.0372107	0.0400434	0.0389342	0.0436103	0.0339706	0.0299919	0.0335109	0.0363419	0.027584	0.0204485	0.0306181	0.0270681	0.0293849	0.0158074	0.0370105	0.0250361	0.0387332	0.0317061	0.0348732	0.0314454	0.0364297	0.0363138	0.0456927	0.0391046	0.0347107	0.0320998	0.0457922	0.0460119	0.0443919	0.0417871	0.0320386	0.0438611	0.0572724	0.0367508	0.0310205	0.0312269	0.0457743	0.0309513	0.0376147
Lr error	0.0457517	0.0464304	0.060598	0.038458	0.0601486	0.0666487	0.0623538	0.0327338	0.0415703	0.0428252	0.0388068	0.0375174	0.0342755	0.0407369	0.0334087	0.0291226	0.0333002	0.0309193	0.029856	0.0368704	0.0250454	0.0271191	0.0270984	0.0346868	0.0360599	0.0303134	0.0391146	0.0360372	0.0299636	0.0317836	0.0286502	0.033474	0.0379991	0.0441521	0.0339901	0.0312321	0.0488966	0.042488	0.0420896	0.0402049	0.0308102	0.0251851	0.046506	0.0316333	0.0474993	0.0313281	0.04138	0.0347664	0.0311723
Ur	0.13429	0.0210296	0.0952237	0.0638206	0.0757295	0.086721	0.13327	0.0787587	0.0555138	0.0544825	0.04462	0.0661813	0.0322145	0.0761426	0.0186946	-0.0142613	0.0335284	0.0579197	0.028981	0.000961395	0.0165277	0.0386998	0.0295677	0.00378437	0.0478053	0.00828104	0.0587997	0.0332015	0.0504031	0.0303371	0.0664731	0.0342974	0.0452444	0.0955015	0.0580687	-0.00815784	0.0633211	0.0303793	0.103548	0.0517501	0.0522402	0.0806871	0.0508965	0.0119591	0.0397554	0.0120031	0.0163814	0.0384173	0.026279
Lr	0.0385147	-0.0733939	-0.0214398	-0.0137477	-0.0419765	-0.0481612	0.00730686	0.00540881	-0.0262907	-0.0286893	-0.0313975	-0.0113795	-0.0409952	-0.00820462	-0.0486847	-0.0733758	-0.0332827	-0.00934147	-0.0284591	-0.0563575	-0.0391358	-0.0154874	-0.0269156	-0.0467099	-0.0252651	-0.0470685	-0.0190481	-0.0345419	-0.0144337	-0.0328919	0.00139316	-0.0354903	-0.0384474	0.0122447	-0.0106321	-0.0714897	-0.0313677	-0.0581206	0.0170665	-0.0302419	-0.0106086	0.0116409	-0.052882	-0.056425	-0.0387644	-0.0505519	-0.0707729	-0.0273005	-0.042508
Intercept	8.78794
r, U and L values are adjusted by the correction factor. Uncorrected values are shown as r uc, U uc, L uc. Bootstrap mean, Ur, Lr are also adjusted by the correction factor.
Upper (Ur error) and lower (Lr error) error bars bound the 95% confidence interval about r as determined by bootstrap resampling.
Upper (U) and lower (L) confidence limits bound the 95% confidence interval about the null hypothesis of No spatial structure for the combined data set as determined by permutation.
[truncated: 1 more columns]

## Sheet: Genotypes_GPS
9	102	1	102
All_GD
CatID	Pop	FCA026		FCA082		FCA096		FCA045		FCA132		FCA090		FCA043		FCA077		Lc120			Lat	Lon
BGWMA02	Pop1	157	157	276	274	204	200	173	173	0	0	132	132	0	0	164	162	145	145		29.5732	-102.949
BGWMA03	Pop1	153	151	270	266	206	200	169	169	0	0	130	122	0	0	162	160	146	146		29.5732	-102.949
JM003	Pop1	157	157	266	262	0	0	0	0	199	193	132	126	0	0	170	164	144	144		32.1062	-101.018
JM004	Pop1	147	147	260	258	0	0	179	179	195	191	130	130	0	0	166	166	146	146		31.8369	-101.085
JM012	Pop1	157	155	266	255	0	0	0	0	199	199	126	126	0	0	166	166	145	145		32.0038	-100.688
J003	Pop1	155	155	268	264	204	202	0	0	193	193	132	124	142	140	166	162	147	147		31.9208	-100.621
J004	Pop1	157	157	266	262	204	204	0	0	0	0	132	130	142	140	170	166	148	148		31.9208	-100.621
LYRU001	Pop1	165	155	270	268	204	204	177	171	201	189	126	126	144	138	162	146	306	306		34.9994	-101.919
LYRU003	Pop1	165	161	268	256	216	216	179	177	201	197	126	124	144	138	166	164	306	306		34.9731	-101.675
LYRU004	Pop1	159	157	270	266	214	200	171	171	199	195	132	124	144	142	164	162	306	298		34.105	-100.798
LYRU005	Pop1	157	155	266	258	206	200	179	173	199	195	132	130	142	142	162	146	306	298		34.105	-100.798
LYRU006	Pop1	177	162	266	256	212	206	177	175	195	191	132	124	144	142	164	162	304	300		34.5106	-101.157
LYRU007	Pop1	0	0	262	270	202	202	171	173	193	199	126	126	142	142	160	166	300	308		35.2363	-101.612
LYRU008	Pop1	159	149	268	260	200	198	173	173	199	195	126	126	138	136	166	164	308	302		34.9857	-101.981
LYRU009	Pop1	159	153	268	266	202	202	171	171	201	189	126	122	144	144	172	162	302	298		34.9823	-101.916
LYRU010	Pop1	157	153	270	266	218	202	171	171	201	189	130	126	144	142	166	162	302	298		34.9994	-101.919
LYRU011	Pop1	159	157	258	258	218	218	173	171	201	195	130	126	138	138	170	152	296	296		33.9303	-99.7153
LYRU012	Pop1	157	149	264	262	202	198	173	171	195	195	132	122	144	138	166	164	306	306		35.9028	-101.145
LYRU013	Pop1	159	159	270	256	208	208	171	171	201	195	126	126	142	140	164	160	302	298		35.2366	-100.6
LYRU014	Pop1	159	155	262	260	208	202	175	173	201	195	122	122	146	136	172	164	0	0		35.0613	-100.456
LYRU015	Pop1	155	151	270	264	206	200	175	173	201	189	124	122	142	140	172	164	308	298		35.4089	-101.671
LYRU016	Pop1	159	157	266	266	208	200	175	171	203	197	124	124	144	144	166	164	302	298		35.8031	-102.633
LYRU017	Pop1	153	147	268	262	218	218	171	171	199	191	132	124	148	142	164	162	0	0		34.065	-100.24
LYRU018	Pop1	153	149	260	256	200	200	173	169	201	189	130	130	148	138	168	158	310	296		34.6804	-100.699
LYRU019	Pop1	153	151	270	268	214	200	171	171	201	189	130	128	144	144	166	164	302	298		34.3893	-100.21
LYRU020	Pop1	159	157	266	256	214	206	173	171	201	189	132	126	142	136	168	156	310	298		34.0165	-100.302
LYRU021	Pop1	171	153	270	256	218	214	171	171	195	193	132	130	144	142	170	164	302	302		34.4182	-100.973
LYRU024	Pop1	153	153	0	0	0	0	177	171	203	195	132	126	144	144	164	164	302	298		34.7145	-100.701
LYRU025	Pop1	153	153	262	258	218	200	171	171	197	193	126	124	144	142	166	164	302	298		34.8949	-100.009
LYRU026	Pop1	153	151	270	268	214	202	173	171	195	193	132	130	144	142	172	168	308	306		34.4182	-100.973
LYRU027	Pop1	157	153	266	266	200	200	173	171	197	193	132	126	142	140	168	162	306	306		34.3358	-100.212
LYRU028	Pop1	159	151	266	256	204	200	173	171	201	201	0	0	146	144	168	156	310	300		34.8676	-100.101
LYRU029	Pop1	157	155	256	254	204	204	177	171	199	193	0	0	142	136	168	164	0	0		34.2745	-100.285
LYRU030	Pop1	149	147	268	264	204	200	173	171	201	191	126	124	144	138	170	162	300	300		34.4182	-100.973
LYRU031	Pop1	159	155	268	266	216	200	185	171	203	201	130	130	144	142	166	166	300	300		34.9988	-100.831
LYRU032	Pop1	155	153	268	266	208	206	181	177	193	191	132	124	142	138	168	166	306	306		34.3117	-99.7381
LYRU034	Pop1	157	153	266	254	202	200	177	177	201	195	134	132	144	144	166	164	302	298		33.9525	-100.855
LYRU035	Pop1	153	153	268	266	216	208	171	171	203	203	132	128	146	144	168	166	306	300		34.9749	-100.26
LYRU036	Pop1	159	151	268	266	202	200	177	171	201	197	134	128	144	140	170	160	308	300		31.1188	-100.515
LYRU038	Pop1	159	153	258	256	218	216	179	171	193	193	128	126	146	144	166	164	296	296		35.8945	-102.475
LYRU039	Pop1	153	149	270	266	214	204	181	177	197	191	134	134	144	142	168	166	308	298		34.942	-101.899
LYRU040	Pop1	153	153	270	256	200	200	171	171	0	0	130	122	142	136	170	166	308	298		35.9947	-101.606
LYRU041	Pop1	157	149	270	264	216	216	173	173	197	191	128	124	146	142	168	158	306	296		31.331	-100.464
LYRU043	Pop1	161	157	266	266	200	200	173	173	203	191	130	126	146	138	0	0	0	0		34.9627	-100.803
LYRU044	Pop1	157	151	258	256	216	208	175	173	195	195	130	124	142	136	170	162	310	298		35.2148	-100.249
LYRU047	Pop1	151	149	266	266	200	200	179	177	0	0	0	0	142	142	168	166	0	0		33.9841	-99.725
LYRU051	Pop1	165	165	270	268	214	200	0	0	195	191	124	122	146	142	162	162	0	0		34.0296	-98.9222
LYRU059	Pop1	159	151	268	266	208	200	175	175	193	193	132	124	146	138	158	158	0	0		31.331	-100.464
LYRU066	Pop1	155	153	258	258	216	212	175	173	193	191	132	122	134	134	166	166	306	298		36.1956	-101.193
LYRU067	Pop1	153	153	268	254	206	204	173	173	0	0	130	122	150	142	170	156	312	308		34.0653	-99.2838
LYRU068	Pop1	0	0	0	0	0	0	179	177	191	191	126	124	142	142	162	162	306	306		34.3938	-100.205
LYRU073	Pop1	159	155	262	258	208	200	175	173	201	195	134	124	144	136	172	166	306	300		36.1956	-101.193
LYRU074	Pop1	157	151	268	264	214	200	173	173	195	195	130	126	142	138	166	164	306	304		36.1956	-101.193
LYRU076	Pop1	155	155	264	260	216	214	173	173	195	191	132	126	144	138	158	158	300	300		34.7265	-100.541
LYRU077	Pop1	159	151	264	262	206	200	171	171	201	197	126	124	142	142	164	162	0	0		34.1492	-99.2994
LYRU079	Pop1	157	155	0	0	204	202	181	173	201	201	126	124	138	138	166	156	298	298		36.1956	-101.193
LYRU084	Pop1	153	151	270	260	218	200	179	175	195	191	126	126	142	138	170	168	300	300		27.7686	-99.3898
LYRU086	Pop1	153	151	268	266	200	200	179	175	201	193	130	130	144	142	166	164	308	300		34.4282	-100.21
LYRU087	Pop1	157	155	262	260	198	198	179	177	195	193	130	126	152	148	164	162	306	304		30.6873	-102.243
LYRU088	Pop1	153	151	266	266	214	200	177	173	199	199	130	128	144	140	170	162	302	298		29.881	-101.203
LYRU090	Pop1	153	151	266	260	200	198	175	175	197	193	132	132	142	142	168	166	306	302		34.4819	-100.154
LYRU091	Pop1	153	151	266	260	206	204	179	177	195	193	132	124	140	140	166	164	296	296		30.2145	-103.244
LYRU092	Pop1	153	153	278	278	204	204	179	177	201	195	126	122	142	142	166	160	304	294		34.9163	-99.762
LYRU093	Pop1	159	151	262	254	216	206	173	173	191	191	126	124	142	142	176	170	308	308		33.9759	-99.7182
LYRU094	Pop1	151	151	268	258	202	200	179	173	197	195	126	126	144	142	168	166	306	296		30.0373	-102.423
LYRU095	Pop1	151	149	260	258	216	200	179	173	193	191	128	126	142	140	166	164	308	300		27.7686	-99.3898
LYRU097	Pop1	157	149	268	264	204	200	177	175	203	197	126	122	146	134	166	162	308	298		34.9142	-100.394
LYRU098	Pop1	155	151	270	266	216	200	173	173	191	191	128	126	142	138	164	160	310	306		32.9346	-99.9519
LYRU099	Pop1	155	153	268	268	214	200	175	173	197	193	132	126	142	140	162	152	310	300		29.881	-101.203
LYRU101	Pop1	149	149	260	258	202	200	215	175	201	195	126	124	144	136	172	166	300	300		34.8651	-100.66
LYRU102	Pop1	153	151	260	258	216	200	179	177	197	193	124	124	140	138	168	166	308	308		31.3745	-102.064
LYRU103	Pop1	153	151	268	268	218	200	173	173	199	191	128	126	142	140	168	168	306	296		33.9156	-99.8123
LYRU104	Pop1	153	151	262	258	216	200	175	171	201	199	124	124	146	144	166	164	300	300		34.8651	-100.66
LYRU105	Pop1	153	151	258	256	200	200	179	173	203	201	124	122	144	136	166	164	300	300		33.9841	-99.725
LYRU106	Pop1	157	153	270	266	208	200	179	175	201	201	126	124	144	142	164	162	306	306		31.3011	-100.987
LYRU108	Pop1	153	151	256	256	216	200	177	175	199	193	130	124	136	136	164	160	310	300		33.9759	-99.7182
LYRU109	Pop1	151	151	266	256	216	204	173	173	199	189	126	126	140	140	168	166	300	300		34.6866	-99.9157
LYRU112	Pop1	159	153	266	266	200	200	179	173	191	189	132	128	142	142	160	160	300	300		33.986	-98.6647
LYRU113	Pop1	0	0	272	272	200	200	179	175	197	193	124	124	138	138	170	168	300	296		31.7912	-102.063
LYRU115	Pop1	159	159	266	260	214	204	179	173	201	195	130	124	144	140	166	166	300	296		30.2145	-103.244
LYRU116	Pop1	155	153	264	254	208	200	175	173	197	195	124	124	140	138	162	162	310	300		29.9796	-100.326
LYRU118	Pop1	0	0	0	0	204	204	179	173	193	191	128	122	142	138	166	164	310	304		29.9796	-100.326
LYRU119	Pop1	157	155	268	258	218	200	175	171	201	197	130	124	146	142	172	166	310	300		34.0709	-100.314
LYRU122	Pop1	153	153	268	266	208	200	175	173	199	189	128	128	144	144	166	166	300	300		34.7062	-100.915
LYRU123	Pop1	151	149	268	264	0	0	175	173	203	197	126	126	0	0	0	0	300	300		34.8553	-100.214
LYRU127	Pop1	159	153	260	256	206	200	171	171	197	195	124	124	146	142	164	160	310	300		29.8145	-102.42
LYRU128	Pop1	153	153	260	256	200	198	179	173	195	193	124	122	146	142	160	160	310	300		32.4907	-100.13
LYRU129	Pop1	155	155	268	258	214	214	173	173	203	201	0	0	0	0	164	164	306	306		34.6866	-99.9157
LYRU131	Pop1	157	151	262	254	202	200	181	175	199	195	130	124	146	142	168	162	302	296		34.3678	-101.057
LYRU132	Pop1	155	155	268	256	208	200	179	179	195	191	126	122	142	134	164	164	310	300		30.2145	-103.244
LYRU133	Pop1	151	151	266	264	206	204	177	173	199	195	128	126	146	138	168	164	310	300		27.7686	-99.3898
LYRU134	Pop1	155	155	268	266	204	198	179	173	199	199	128	124	144	136	174	164	310	300		29.3755	-100.901
LYRU135	Pop1	0	0	0	0	202	198	175	173	201	193	130	130	142	138	172	164	310	300		34.6866	-99.9157
LYRU136	Pop1	161	155	0	0	216	216	173	155	201	201	132	122	144	142	166	162	316	300		31.4917	-103.188
LYRU137	Pop1	153	151	0	0	206	200	179	179	195	189	124	124	142	136	166	162	310	300		32.7457	-99.3801
LYRU139	Pop1	157	153	0	0	208	204	179	155	199	191	134	124	144	142	172	172	310	300		31.4917	-103.188
LYRU141	Pop1	155	153	268	266	208	204	179	177	195	195	0	0	142	140	172	168	300	300		30.2145	-103.244
LYRU142	Pop1	0	0	0	0	0	0	179	171	195	195	126	126	142	140	0	0	300	300		33.9	-100.859
LYRU143	Pop1	153	151	264	262	202	202	177	175	189	187	136	132	142	142	166	166	300	298		34.874	-99.5055
LYRU144	Pop1	0	0	288	288	208	200	173	173	195	195	128	128	144	142	174	164	310	300		30.2145	-103.244
LYRU145	Pop1	155	155	270	264	206	200	177	173	0	0	126	124	142	138	170	170	310	310		29.9796	-100.326
LYRU287	Pop1	153	151	266	256	216	216	187	173	209	205	132	126	136	136	168	166	0	0		35.1929	-101.684

## Sheet: Genotypes
9	102	2	102	0	0	0	0
HWE_test
CatID	Pop	FCA026		FCA082		FCA096		FCA045		FCA132		FCA090		FCA043		FCA077		Lc120
BGWMA02	Pop1	157	157	276	274	204	200	173	173	0	0	132	132	0	0	164	162	145	145
BGWMA03	Pop1	153	151	270	266	206	200	169	169	0	0	130	122	0	0	162	160	146	146
JM003	Pop1	157	157	266	262	0	0	0	0	199	193	132	126	0	0	170	164	144	144
JM004	Pop1	147	147	260	258	0	0	179	179	195	191	130	130	0	0	166	166	146	146
JM012	Pop1	157	155	266	255	0	0	0	0	199	199	126	126	0	0	166	166	145	145
J003	Pop1	155	155	268	264	204	202	0	0	193	193	132	124	142	140	166	162	147	147
J004	Pop1	157	157	266	262	204	204	0	0	0	0	132	130	142	140	170	166	148	148
LYRU001	Pop1	165	155	270	268	204	204	177	171	201	189	126	126	144	138	162	146	306	306
LYRU003	Pop1	165	161	268	256	216	216	179	177	201	197	126	124	144	138	166	164	306	306
LYRU004	Pop1	159	157	270	266	214	200	171	171	199	195	132	124	144	142	164	162	306	298
LYRU005	Pop1	157	155	266	258	206	200	179	173	199	195	132	130	142	142	162	146	306	298
LYRU006	Pop1	177	162	266	256	212	206	177	175	195	191	132	124	144	142	164	162	304	300
LYRU007	Pop1	0	0	262	270	202	202	171	173	193	199	126	126	142	142	160	166	300	308
LYRU008	Pop1	159	149	268	260	200	198	173	173	199	195	126	126	138	136	166	164	308	302
LYRU009	Pop1	159	153	268	266	202	202	171	171	201	189	126	122	144	144	172	162	302	298
LYRU010	Pop1	157	153	270	266	218	202	171	171	201	189	130	126	144	142	166	162	302	298
LYRU011	Pop1	159	157	258	258	218	218	173	171	201	195	130	126	138	138	170	152	296	296
LYRU012	Pop1	157	149	264	262	202	198	173	171	195	195	132	122	144	138	166	164	306	306
LYRU013	Pop1	159	159	270	256	208	208	171	171	201	195	126	126	142	140	164	160	302	298
LYRU014	Pop1	159	155	262	260	208	202	175	173	201	195	122	122	146	136	172	164	0	0
LYRU015	Pop1	155	151	270	264	206	200	175	173	201	189	124	122	142	140	172	164	308	298
LYRU016	Pop1	159	157	266	266	208	200	175	171	203	197	124	124	144	144	166	164	302	298
LYRU017	Pop1	153	147	268	262	218	218	171	171	199	191	132	124	148	142	164	162	0	0
LYRU018	Pop1	153	149	260	256	200	200	173	169	201	189	130	130	148	138	168	158	310	296
LYRU019	Pop1	153	151	270	268	214	200	171	171	201	189	130	128	144	144	166	164	302	298
LYRU020	Pop1	159	157	266	256	214	206	173	171	201	189	132	126	142	136	168	156	310	298
LYRU021	Pop1	171	153	270	256	218	214	171	171	195	193	132	130	144	142	170	164	302	302
LYRU024	Pop1	153	153	0	0	0	0	177	171	203	195	132	126	144	144	164	164	302	298
LYRU025	Pop1	153	153	262	258	218	200	171	171	197	193	126	124	144	142	166	164	302	298
LYRU026	Pop1	153	151	270	268	214	202	173	171	195	193	132	130	144	142	172	168	308	306
LYRU027	Pop1	157	153	266	266	200	200	173	171	197	193	132	126	142	140	168	162	306	306
LYRU028	Pop1	159	151	266	256	204	200	173	171	201	201	0	0	146	144	168	156	310	300
LYRU029	Pop1	157	155	256	254	204	204	177	171	199	193	0	0	142	136	168	164	0	0
LYRU030	Pop1	149	147	268	264	204	200	173	171	201	191	126	124	144	138	170	162	300	300
LYRU031	Pop1	159	155	268	266	216	200	185	171	203	201	130	130	144	142	166	166	300	300
LYRU032	Pop1	155	153	268	266	208	206	181	177	193	191	132	124	142	138	168	166	306	306
LYRU034	Pop1	157	153	266	254	202	200	177	177	201	195	134	132	144	144	166	164	302	298
LYRU035	Pop1	153	153	268	266	216	208	171	171	203	203	132	128	146	144	168	166	306	300
LYRU036	Pop1	159	151	268	266	202	200	177	171	201	197	134	128	144	140	170	160	308	300
LYRU038	Pop1	159	153	258	256	218	216	179	171	193	193	128	126	146	144	166	164	296	296
LYRU039	Pop1	153	149	270	266	214	204	181	177	197	191	134	134	144	142	168	166	308	298
LYRU040	Pop1	153	153	270	256	200	200	171	171	0	0	130	122	142	136	170	166	308	298
LYRU041	Pop1	157	149	270	264	216	216	173	173	197	191	128	124	146	142	168	158	306	296
LYRU043	Pop1	161	157	266	266	200	200	173	173	203	191	130	126	146	138	0	0	0	0
LYRU044	Pop1	157	151	258	256	216	208	175	173	195	195	130	124	142	136	170	162	310	298
LYRU047	Pop1	151	149	266	266	200	200	179	177	0	0	0	0	142	142	168	166	0	0
LYRU051	Pop1	165	165	270	268	214	200	0	0	195	191	124	122	146	142	162	162	0	0
LYRU059	Pop1	159	151	268	266	208	200	175	175	193	193	132	124	146	138	158	158	0	0
LYRU066	Pop1	155	153	258	258	216	212	175	173	193	191	132	122	134	134	166	166	306	298
LYRU067	Pop1	153	153	268	254	206	204	173	173	0	0	130	122	150	142	170	156	312	308
LYRU068	Pop1	0	0	0	0	0	0	179	177	191	191	126	124	142	142	162	162	306	306
LYRU073	Pop1	159	155	262	258	208	200	175	173	201	195	134	124	144	136	172	166	306	300
LYRU074	Pop1	157	151	268	264	214	200	173	173	195	195	130	126	142	138	166	164	306	304
LYRU076	Pop1	155	155	264	260	216	214	173	173	195	191	132	126	144	138	158	158	300	300
LYRU077	Pop1	159	151	264	262	206	200	171	171	201	197	126	124	142	142	164	162	0	0
LYRU079	Pop1	157	155	0	0	204	202	181	173	201	201	126	124	138	138	166	156	298	298
LYRU084	Pop1	153	151	270	260	218	200	179	175	195	191	126	126	142	138	170	168	300	300
LYRU086	Pop1	153	151	268	266	200	200	179	175	201	193	130	130	144	142	166	164	308	300
LYRU087	Pop1	157	155	262	260	198	198	179	177	195	193	130	126	152	148	164	162	306	304
LYRU088	Pop1	153	151	266	266	214	200	177	173	199	199	130	128	144	140	170	162	302	298
LYRU090	Pop1	153	151	266	260	200	198	175	175	197	193	132	132	142	142	168	166	306	302
LYRU091	Pop1	153	151	266	260	206	204	179	177	195	193	132	124	140	140	166	164	296	296
LYRU092	Pop1	153	153	278	278	204	204	179	177	201	195	126	122	142	142	166	160	304	294
LYRU093	Pop1	159	151	262	254	216	206	173	173	191	191	126	124	142	142	176	170	308	308
LYRU094	Pop1	151	151	268	258	202	200	179	173	197	195	126	126	144	142	168	166	306	296
LYRU095	Pop1	151	149	260	258	216	200	179	173	193	191	128	126	142	140	166	164	308	300
LYRU097	Pop1	157	149	268	264	204	200	177	175	203	197	126	122	146	134	166	162	308	298
LYRU098	Pop1	155	151	270	266	216	200	173	173	191	191	128	126	142	138	164	160	310	306
LYRU099	Pop1	155	153	268	268	214	200	175	173	197	193	132	126	142	140	162	152	310	300
LYRU101	Pop1	149	149	260	258	202	200	215	175	201	195	126	124	144	136	172	166	300	300
LYRU102	Pop1	153	151	260	258	216	200	179	177	197	193	124	124	140	138	168	166	308	308
LYRU103	Pop1	153	151	268	268	218	200	173	173	199	191	128	126	142	140	168	168	306	296
LYRU104	Pop1	153	151	262	258	216	200	175	171	201	199	124	124	146	144	166	164	300	300
LYRU105	Pop1	153	151	258	256	200	200	179	173	203	201	124	122	144	136	166	164	300	300
LYRU106	Pop1	157	153	270	266	208	200	179	175	201	201	126	124	144	142	164	162	306	306
LYRU108	Pop1	153	151	256	256	216	200	177	175	199	193	130	124	136	136	164	160	310	300
LYRU109	Pop1	151	151	266	256	216	204	173	173	199	189	126	126	140	140	168	166	300	300
LYRU112	Pop1	159	153	266	266	200	200	179	173	191	189	132	128	142	142	160	160	300	300
LYRU113	Pop1	0	0	272	272	200	200	179	175	197	193	124	124	138	138	170	168	300	296
LYRU115	Pop1	159	159	266	260	214	204	179	173	201	195	130	124	144	140	166	166	300	296
LYRU116	Pop1	155	153	264	254	208	200	175	173	197	195	124	124	140	138	162	162	310	300
LYRU118	Pop1	0	0	0	0	204	204	179	173	193	191	128	122	142	138	166	164	310	304
LYRU119	Pop1	157	155	268	258	218	200	175	171	201	197	130	124	146	142	172	166	310	300
LYRU122	Pop1	153	153	268	266	208	200	175	173	199	189	128	128	144	144	166	166	300	300
LYRU123	Pop1	151	149	268	264	0	0	175	173	203	197	126	126	0	0	0	0	300	300
LYRU127	Pop1	159	153	260	256	206	200	171	171	197	195	124	124	146	142	164	160	310	300
LYRU128	Pop1	153	153	260	256	200	198	179	173	195	193	124	122	146	142	160	160	310	300
LYRU129	Pop1	155	155	268	258	214	214	173	173	203	201	0	0	0	0	164	164	306	306
LYRU131	Pop1	157	151	262	254	202	200	181	175	199	195	130	124	146	142	168	162	302	296
LYRU132	Pop1	155	155	268	256	208	200	179	179	195	191	126	122	142	134	164	164	310	300
LYRU133	Pop1	151	151	266	264	206	204	177	173	199	195	128	126	146	138	168	164	310	300
LYRU134	Pop1	155	155	268	266	204	198	179	173	199	199	128	124	144	136	174	164	310	300
LYRU135	Pop1	0	0	0	0	202	198	175	173	201	193	130	130	142	138	172	164	310	300
LYRU136	Pop1	161	155	0	0	216	216	173	155	201	201	132	122	144	142	166	162	316	300
LYRU137	Pop1	153	151	0	0	206	200	179	179	195	189	124	124	142	136	166	162	310	300
LYRU139	Pop1	157	153	0	0	208	204	179	155	199	191	134	124	144	142	172	172	310	300
LYRU141	Pop1	155	153	268	266	208	204	179	177	195	195	0	0	142	140	172	168	300	300
LYRU142	Pop1	0	0	0	0	0	0	179	171	195	195	126	126	142	140	0	0	300	300
LYRU143	Pop1	153	151	264	262	202	202	177	175	189	187	136	132	142	142	166	166	300	298
LYRU144	Pop1	0	0	288	288	208	200	173	173	195	195	128	128	144	142	174	164	310	300
LYRU145	Pop1	155	155	270	264	206	200	177	173	0	0	126	124	142	138	170	170	310	310
LYRU287	Pop1	153	151	266	256	216	216	187	173	209	205	132	126	136	136	168	166	0	0

## Sheet: AFP (2)
Allele Frequencies by Population for Codominant Data
*With Step by Step option
Data Sheet	Genotypes
Data Title	HWE_test
No. Loci	9
No. Samples	102
No. Pops.	1
Allele Counts and Total Count by Population
Locus	Allele/n	Pop1
FCA026
	147	4
	149	12
	151	35
	153	50
	155	30
	157	28
	159	21
	161	3
	162	1
	165	4
	171	1
	177	1
FCA082
	254	6
	255	1
	256	19
	258	18
	260	15
	262	14
	264	14
	266	42
	268	31
	270	18
	272	2
	274	1
	276	1
	278	2
	288	2
FCA096
	198	8
	200	61
	202	18
	204	25
	206	14
	208	16
	212	2
	214	14
	216	21
	218	11
FCA045
	155	2
	169	3
	171	42
	173	60
	175	27
	177	23
	179	30
	181	4
	185	1
	187	1
	215	1
FCA132
	187	1
	189	12
	191	24
	193	27
	195	41
	197	18
	199	21
	201	34
	203	10
	205	1
	209	1
FCA090	N	194
	122	17
	124	44
	126	51
	128	17
	130	29
	132	29
	134	6
	136	1
FCA043
	134	4
	136	15
	138	25
	140	19
	142	65
	144	42
	146	15
	148	3
	150	1
	152	1
FCA077
	146	2
	152	2
	156	4
	158	6
	160	12
	162	28
	164	41
	166	51
	168	23
	170	15
	172	11
	174	2
	176	1
Lc120
	144	2
	145	4
	146	4
	147	2
	148	2
	294	1
	296	13
	298	21
	300	51
	302	14
	304	5
	306	29
	308	15
	310	21
	312	1
	316	1
Allele Frequencies and Sample Size by Populations
Locus	Allele/n	Pop1
FCA026	N	95
	147	0.02105
	149	0.06316
	151	0.18421
	153	0.26316
	155	0.15789
	157	0.14737
	159	0.11053
	161	0.01579
	162	0.00526
	165	0.02105
	171	0.00526
	177	0.00526
FCA082	N	93
	254	0.03226
	255	0.00538
	256	0.10215
	258	0.09677
	260	0.08065
	262	0.07527
	264	0.07527
	266	0.22581
	268	0.16667
	270	0.09677
	272	0.01075
	274	0.00538
	276	0.00538
	278	0.01075
	288	0.01075
FCA096	N	95
	198	0.04211
	200	0.32105
	202	0.09474
	204	0.13158
	206	0.07368
	208	0.08421
	212	0.01053
	214	0.07368
	216	0.11053
	218	0.05789
FCA045	N	97
	155	0.01031
	169	0.01546
	171	0.21649
	173	0.30928
	175	0.13918
	177	0.11856
	179	0.15464
	181	0.02062
	185	0.00515
	187	0.00515
	215	0.00515
FCA132	N	95
	187	0.00526
	189	0.06316
	191	0.12632
	193	0.14211
	195	0.21579
	197	0.09474
	199	0.11053
	201	0.17895
	203	0.05263
	205	0.00526
	209	0.00526
FCA090	N	97
	122	0.08763
	124	0.2268
	126	0.26289
	128	0.08763
	130	0.14948
	132	0.14948
	134	0.03093
	136	0.00515
FCA043	N	95
	134	0.02105
	136	0.07895
	138	0.13158
	140	0.1
	142	0.34211
	144	0.22105
	146	0.07895
	148	0.01579
	150	0.00526
	152	0.00526
FCA077	N	99
	146	0.0101
	152	0.0101
	156	0.0202
	158	0.0303
	160	0.06061
	162	0.14141
	164	0.20707
	166	0.25758
	168	0.11616
	170	0.07576
	172	0.05556
	174	0.0101
	176	0.00505
Lc120	N	93
	144	0.01075
	145	0.02151
	146	0.02151
	147	0.01075
	148	0.01075
	294	0.00538
	296	0.06989
	298	0.1129
	300	0.27419
	302	0.07527
	304	0.02688
	306	0.15591
	308	0.08065
	310	0.1129
	312	0.00538
	316	0.00538
Warning! Results should be treated with caution given the following:
There is 6% missing data at the locus 'FCA026' in the population 'Pop1!
There is 8% missing data at the locus 'FCA082' in the population 'Pop1!
There is 6% missing data at the locus 'FCA096' in the population 'Pop1!
There is 6% missing data at the locus 'FCA132' in the population 'Pop1!
There is 6% missing data at the locus 'FCA043' in the population 'Pop1!
There is 8% missing data at the locus 'Lc120' in the population 'Pop1!

## Sheet: AGL (2)
Allele Frequencies by Population with Graph over Loci for Codominant Data
Data Sheet	Genotypes
Data Title	HWE_test
No. Loci	9
No. Samples	102
No. Pops.	1
Allele Frequencies by Populations
Locus	Allele	Pop1
FCA026	147	0.02105
	149	0.06316
	151	0.18421
	153	0.26316
	155	0.15789
	157	0.14737
	159	0.11053
	161	0.01579
	162	0.00526
	165	0.02105
	171	0.00526
	177	0.00526
FCA082	254	0.03226
	255	0.00538
	256	0.10215
	258	0.09677
	260	0.08065
	262	0.07527
	264	0.07527
	266	0.22581
	268	0.16667
	270	0.09677
	272	0.01075
	274	0.00538
	276	0.00538
	278	0.01075
	288	0.01075
FCA096	198	0.04211
	200	0.32105
	202	0.09474
	204	0.13158
	206	0.07368
	208	0.08421
	212	0.01053
	214	0.07368
	216	0.11053
	218	0.05789
FCA045	155	0.01031
	169	0.01546
	171	0.21649
	173	0.30928
	175	0.13918
	177	0.11856
	179	0.15464
	181	0.02062
	185	0.00515
	187	0.00515
	215	0.00515
FCA132	187	0.00526
	189	0.06316
	191	0.12632
	193	0.14211
	195	0.21579
	197	0.09474
	199	0.11053
	201	0.17895
	203	0.05263
	205	0.00526
	209	0.00526
FCA090	122	0.08763
	124	0.2268
	126	0.26289
	128	0.08763
	130	0.14948
	132	0.14948
	134	0.03093
	136	0.00515
FCA043	134	0.02105
	136	0.07895
	138	0.13158
	140	0.1
	142	0.34211
	144	0.22105
	146	0.07895
	148	0.01579
	150	0.00526
	152	0.00526
FCA077	146	0.0101
	152	0.0101
	156	0.0202
	158	0.0303
	160	0.06061
	162	0.14141
	164	0.20707
	166	0.25758
	168	0.11616
	170	0.07576
	172	0.05556
	174	0.0101
	176	0.00505
Lc120	144	0.01075
	145	0.02151
	146	0.02151
	147	0.01075
	148	0.01075
	294	0.00538
	296	0.06989
	298	0.1129
	300	0.27419
	302	0.07527
	304	0.02688
	306	0.15591
	308	0.08065
	310	0.1129
	312	0.00538
	316	0.00538
Warning! Results should be treated with caution given the following:
There is 6% missing data at the locus 'FCA026' in the population 'Pop1!
There is 8% missing data at the locus 'FCA082' in the population 'Pop1!
There is 6% missing data at the locus 'FCA096' in the population 'Pop1!
There is 6% missing data at the locus 'FCA132' in the population 'Pop1!
There is 6% missing data at the locus 'FCA043' in the population 'Pop1!
There is 8% missing data at the locus 'Lc120' in the population 'Pop1!

## Sheet: AFP
Allele Frequencies by Population for Codominant Data
Data Sheet	Genotypes
Data Title	Freq_all
No. Loci	9
No. Samples	102
No. Pops.	5
Allele Frequencies and Sample Size by Populations
Locus	Allele/n	Pop1	Pop2	Pop3	Pop4	Pop5
FCA026	N	95	0	0	0	0
	147	0.02105	0	0	0	0
	149	0.06316	0	0	0	0
	151	0.18421	0	0	0	0
	153	0.26316	0	0	0	0
	155	0.15789	0	0	0	0
	157	0.14737	0	0	0	0
	159	0.11053	0	0	0	0
	161	0.01579	0	0	0	0
	162	0.00526	0	0	0	0
	165	0.02105	0	0	0	0
	171	0.00526	0	0	0	0
	177	0.00526	0	0	0	0
FCA082	N	93	0	0	0	0
	254	0.03226	0	0	0	0
	255	0.00538	0	0	0	0
	256	0.10215	0	0	0	0
	258	0.09677	0	0	0	0
	260	0.08065	0	0	0	0
	262	0.07527	0	0	0	0
	264	0.07527	0	0	0	0
	266	0.22581	0	0	0	0
	268	0.16667	0	0	0	0
	270	0.09677	0	0	0	0
	272	0.01075	0	0	0	0
	274	0.00538	0	0	0	0
	276	0.00538	0	0	0	0
	278	0.01075	0	0	0	0
	288	0.01075	0	0	0	0
FCA096	N	95	0	0	0	0
	198	0.04211	0	0	0	0
	200	0.32105	0	0	0	0
	202	0.09474	0	0	0	0
	204	0.13158	0	0	0	0
	206	0.07368	0	0	0	0
	208	0.08421	0	0	0	0
	212	0.01053	0	0	0	0
	214	0.07368	0	0	0	0
	216	0.11053	0	0	0	0
	218	0.05789	0	0	0	0
FCA045	N	97	0	0	0	0
	155	0.01031	0	0	0	0
	169	0.01546	0	0	0	0
	171	0.21649	0	0	0	0
	173	0.30928	0	0	0	0
	175	0.13918	0	0	0	0
	177	0.11856	0	0	0	0
	179	0.15464	0	0	0	0
	181	0.02062	0	0	0	0
	185	0.00515	0	0	0	0
	187	0.00515	0	0	0	0
	215	0.00515	0	0	0	0
FCA132	N	95	0	0	0	0
	187	0.00526	0	0	0	0
	189	0.06316	0	0	0	0
	191	0.12632	0	0	0	0
	193	0.14211	0	0	0	0
	195	0.21579	0	0	0	0
	197	0.09474	0	0	0	0
	199	0.11053	0	0	0	0
	201	0.17895	0	0	0	0
	203	0.05263	0	0	0	0
	205	0.00526	0	0	0	0
	209	0.00526	0	0	0	0
FCA090	N	97	0	0	0	0
	122	0.08763	0	0	0	0
	124	0.2268	0	0	0	0
	126	0.26289	0	0	0	0
	128	0.08763	0	0	0	0
	130	0.14948	0	0	0	0
	132	0.14948	0	0	0	0
	134	0.03093	0	0	0	0
	136	0.00515	0	0	0	0
FCA043	N	95	0	0	0	0
	134	0.02105	0	0	0	0
	136	0.07895	0	0	0	0
	138	0.13158	0	0	0	0
	140	0.1	0	0	0	0
	142	0.34211	0	0	0	0
	144	0.22105	0	0	0	0
	146	0.07895	0	0	0	0
	148	0.01579	0	0	0	0
	150	0.00526	0	0	0	0
	152	0.00526	0	0	0	0
FCA077	N	99	0	0	0	0
	146	0.0101	0	0	0	0
	152	0.0101	0	0	0	0
	156	0.0202	0	0	0	0
	158	0.0303	0	0	0	0
	160	0.06061	0	0	0	0
	162	0.14141	0	0	0	0
	164	0.20707	0	0	0	0
	166	0.25758	0	0	0	0
	168	0.11616	0	0	0	0
	170	0.07576	0	0	0	0
	172	0.05556	0	0	0	0
	174	0.0101	0	0	0	0
	176	0.00505	0	0	0	0
Lc120	N	93	0	0	0	0
	144	0.01075	0	0	0	0
	145	0.02151	0	0	0	0
	146	0.02151	0	0	0	0
	147	0.01075	0	0	0	0
	148	0.01075	0	0	0	0
	294	0.00538	0	0	0	0
	296	0.06989	0	0	0	0
	298	0.1129	0	0	0	0
	300	0.27419	0	0	0	0
	302	0.07527	0	0	0	0
	304	0.02688	0	0	0	0
	306	0.15591	0	0	0	0
	308	0.08065	0	0	0	0
	310	0.1129	0	0	0	0
	312	0.00538	0	0	0	0
	316	0.00538	0	0	0	0
Warning! Results should be treated with caution given the following:
The sample size in the population Pop2 is less than 5!
The sample size in the population Pop3 is less than 5!
The sample size in the population Pop4 is less than 5!
The sample size in the population Pop5 is less than 5!
There is 6% missing data at the locus 'FCA026' in the population 'Pop1!
There is 8% missing data at the locus 'FCA082' in the population 'Pop1!
There is 6% missing data at the locus 'FCA096' in the population 'Pop1!
There is 6% missing data at the locus 'FCA132' in the population 'Pop1!
There is 6% missing data at the locus 'FCA043' in the population 'Pop1!
There is 8% missing data at the locus 'Lc120' in the population 'Pop1!

## Sheet: AGL
Allele Frequencies by Population with Graph over Loci for Codominant Data
Data Sheet	Genotypes
Data Title	Freq_all
No. Loci	9
No. Samples	102
No. Pops.	5
Allele Frequencies by Populations
Locus	Allele	Pop1	Pop2	Pop3	Pop4	Pop5
FCA026	147	0.02105	0	0	0	0
	149	0.06316	0	0	0	0
	151	0.18421	0	0	0	0
	153	0.26316	0	0	0	0
	155	0.15789	0	0	0	0
	157	0.14737	0	0	0	0
	159	0.11053	0	0	0	0
	161	0.01579	0	0	0	0
	162	0.00526	0	0	0	0
	165	0.02105	0	0	0	0
	171	0.00526	0	0	0	0
	177	0.00526	0	0	0	0
FCA082	254	0.03226	0	0	0	0
	255	0.00538	0	0	0	0
	256	0.10215	0	0	0	0
	258	0.09677	0	0	0	0
	260	0.08065	0	0	0	0
	262	0.07527	0	0	0	0
	264	0.07527	0	0	0	0
	266	0.22581	0	0	0	0
	268	0.16667	0	0	0	0
	270	0.09677	0	0	0	0
	272	0.01075	0	0	0	0
	274	0.00538	0	0	0	0
	276	0.00538	0	0	0	0
	278	0.01075	0	0	0	0
	288	0.01075	0	0	0	0
FCA096	198	0.04211	0	0	0	0
	200	0.32105	0	0	0	0
	202	0.09474	0	0	0	0
	204	0.13158	0	0	0	0
	206	0.07368	0	0	0	0
	208	0.08421	0	0	0	0
	212	0.01053	0	0	0	0
	214	0.07368	0	0	0	0
	216	0.11053	0	0	0	0
	218	0.05789	0	0	0	0
FCA045	155	0.01031	0	0	0	0
	169	0.01546	0	0	0	0
	171	0.21649	0	0	0	0
	173	0.30928	0	0	0	0
	175	0.13918	0	0	0	0
	177	0.11856	0	0	0	0
	179	0.15464	0	0	0	0
	181	0.02062	0	0	0	0
	185	0.00515	0	0	0	0
	187	0.00515	0	0	0	0
	215	0.00515	0	0	0	0
FCA132	187	0.00526	0	0	0	0
	189	0.06316	0	0	0	0
	191	0.12632	0	0	0	0
	193	0.14211	0	0	0	0
	195	0.21579	0	0	0	0
	197	0.09474	0	0	0	0
	199	0.11053	0	0	0	0
	201	0.17895	0	0	0	0
	203	0.05263	0	0	0	0
	205	0.00526	0	0	0	0
	209	0.00526	0	0	0	0
FCA090	122	0.08763	0	0	0	0
	124	0.2268	0	0	0	0
	126	0.26289	0	0	0	0
	128	0.08763	0	0	0	0
	130	0.14948	0	0	0	0
	132	0.14948	0	0	0	0
	134	0.03093	0	0	0	0
	136	0.00515	0	0	0	0
FCA043	134	0.02105	0	0	0	0
	136	0.07895	0	0	0	0
	138	0.13158	0	0	0	0
	140	0.1	0	0	0	0
	142	0.34211	0	0	0	0
	144	0.22105	0	0	0	0
	146	0.07895	0	0	0	0
	148	0.01579	0	0	0	0
	150	0.00526	0	0	0	0
	152	0.00526	0	0	0	0
FCA077	146	0.0101	0	0	0	0
	152	0.0101	0	0	0	0
	156	0.0202	0	0	0	0
	158	0.0303	0	0	0	0
	160	0.06061	0	0	0	0
	162	0.14141	0	0	0	0
	164	0.20707	0	0	0	0
	166	0.25758	0	0	0	0
	168	0.11616	0	0	0	0
	170	0.07576	0	0	0	0
	172	0.05556	0	0	0	0
	174	0.0101	0	0	0	0
	176	0.00505	0	0	0	0
Lc120	144	0.01075	0	0	0	0
	145	0.02151	0	0	0	0
	146	0.02151	0	0	0	0
	147	0.01075	0	0	0	0
	148	0.01075	0	0	0	0
	294	0.00538	0	0	0	0
	296	0.06989	0	0	0	0
	298	0.1129	0	0	0	0
	300	0.27419	0	0	0	0
	302	0.07527	0	0	0	0
	304	0.02688	0	0	0	0
	306	0.15591	0	0	0	0
	308	0.08065	0	0	0	0
	310	0.1129	0	0	0	0
	312	0.00538	0	0	0	0
	316	0.00538	0	0	0	0
Warning! Results should be treated with caution given the following:
The sample size in the population Pop2 is less than 5!
The sample size in the population Pop3 is less than 5!
The sample size in the population Pop4 is less than 5!
The sample size in the population Pop5 is less than 5!
There is 6% missing data at the locus 'FCA026' in the population 'Pop1!
There is 8% missing data at the locus 'FCA082' in the population 'Pop1!
There is 6% missing data at the locus 'FCA096' in the population 'Pop1!
There is 6% missing data at the locus 'FCA132' in the population 'Pop1!
There is 6% missing data at the locus 'FCA043' in the population 'Pop1!
There is 8% missing data at the locus 'Lc120' in the population 'Pop1!

## Sheet: AFL
Allele Frequencies by Locus for Codominant Data
Data Sheet	Genotypes
Data Title	Freq_all
No. Loci	9
No. Samples	102
No. Pops.	5
Allele Frequencies and Sample Size by Locus
Pop	Allele/n	FCA026	FCA082	FCA096	FCA045	FCA132	FCA090	FCA043	FCA077	Lc120
Pop1	N	95	93	95	97	95	97	95	99	93
	122						0.08763
	124						0.2268
	126						0.26289
	128						0.08763
	130						0.14948
	132						0.14948
	134						0.03093	0.02105
	136						0.00515	0.07895
	138							0.13158
	140							0.1
	142							0.34211
	144							0.22105		0.01075
	145									0.02151
	146							0.07895	0.0101	0.02151
	147	0.02105								0.01075
	148							0.01579		0.01075
	149	0.06316
	150							0.00526
	151	0.18421
	152							0.00526	0.0101
	153	0.26316
	155	0.15789			0.01031
	156								0.0202
	157	0.14737
	158								0.0303
	159	0.11053
	160								0.06061
	161	0.01579
	162	0.00526							0.14141
	164								0.20707
	165	0.02105
	166								0.25758
	168								0.11616
	169				0.01546
	170								0.07576
	171	0.00526			0.21649
	172								0.05556
	173				0.30928
	174								0.0101
	175				0.13918
	176								0.00505
	177	0.00526			0.11856
	179				0.15464
	181				0.02062
	185				0.00515
	187				0.00515	0.00526
	189					0.06316
	191					0.12632
	193					0.14211
	195					0.21579
	197					0.09474
	198			0.04211
	199					0.11053
	200			0.32105
	201					0.17895
	202			0.09474
	203					0.05263
	204			0.13158
	205					0.00526
	206			0.07368
	208			0.08421
	209					0.00526
	212			0.01053
	214			0.07368
	215				0.00515
	216			0.11053
	218			0.05789
	254		0.03226
	255		0.00538
	256		0.10215
	258		0.09677
	260		0.08065
	262		0.07527
	264		0.07527
	266		0.22581
	268		0.16667
	270		0.09677
	272		0.01075
	274		0.00538
	276		0.00538
	278		0.01075
	288		0.01075
	294									0.00538
	296									0.06989
	298									0.1129
	300									0.27419
	302									0.07527
	304									0.02688
	306									0.15591
	308									0.08065
	310									0.1129
	312									0.00538
	316									0.00538
Pop2	N	0	0	0	0	0	0	0	0	0
	122						0
	124						0
	126						0
	128						0
	130						0
	132						0
	134						0	0
	136						0	0
	138							0
	140							0
	142							0
	144							0		0
	145									0
	146							0	0	0
	147	0								0
	148							0		0
	149	0
	150							0
	151	0
	152							0	0
	153	0
	155	0			0
	156								0
	157	0
	158								0
	159	0
	160								0
	161	0
	162	0							0
	164								0
	165	0
	166								0
	168								0
	169				0
	170								0
	171	0			0
	172								0
	173				0
	174								0
	175				0
	176								0
	177	0			0
	179				0
	181				0
	185				0
	187				0	0
	189					0
	191					0
	193					0
	195					0
	197					0
	198			0
	199					0
	200			0
	201					0
	202			0
	203					0
	204			0
	205					0
	206			0
	208			0
	209					0
	212			0
	214			0
	215				0
	216			0
	218			0
	254		0
	255		0
	256		0
	258		0
	260		0
	262		0
	264		0
	266		0
	268		0
	270		0
	272		0
	274		0
	276		0
	278		0
	288		0
	294									0
	296									0
	298									0
	300									0
	302									0
	304									0
	306									0
	308									0
	310									0
	312									0
	316									0
Pop3	N	0	0	0	0	0	0	0	0	0
	122						0
	124						0
	126						0
	128						0
	130						0
	132						0
	134						0	0
	136						0	0
	138							0
	140							0
	142							0
	144							0		0
	145									0
	146							0	0	0
	147	0								0
	148							0		0
	149	0
	150							0
	151	0
	152							0	0
	153	0
	155	0			0
	156								0
	157	0
	158								0
	159	0
	160								0
	161	0
	162	0							0
	164								0
	165	0
	166								0
	168								0
	169				0
	170								0
	171	0			0
	172								0
	173				0
	174								0
	175				0
	176								0
	177	0			0
	179				0
	181				0
	185				0
	187				0	0
	189					0
	191					0
	193					0
	195					0
	197					0
	198			0
	199					0
	200			0
	201					0
	202			0
	203					0
	204			0
	205					0
	206			0
	208			0
	209					0
	212			0
	214			0
	215				0
	216			0
	218			0
	254		0
	255		0
	256		0
	258		0
	260		0
	262		0
	264		0
	266		0
	268		0
	270		0
	272		0
	274		0
	276		0
	278		0
	288		0
	294									0
	296									0
	298									0
	300									0
	302									0
	304									0
	306									0
	308									0
	310									0
	312									0
	316									0
Pop4	N	0	0	0	0	0	0	0	0	0
	122						0
	124						0
	126						0
	128						0
	130						0
	132						0
	134						0	0
	136						0	0
	138							0
	140							0
	142							0
	144							0		0
	145									0
	146							0	0	0
	147	0								0
	148							0		0
	149	0
	150							0
	151	0
	152							0	0
	153	0
	155	0			0
	156								0
	157	0
	158								0
	159	0
	160								0
	161	0
	162	0							0
	164								0
	165	0
	166								0
	168								0
	169				0
	170								0
	171	0			0
	172								0
	173				0
	174								0
	175				0
	176								0
	177	0			0
	179				0
	181				0
	185				0
	187				0	0
	189					0
	191					0
	193					0
	195					0
	197					0
	198			0
	199					0
	200			0
	201					0
	202			0
	203					0
	204			0
	205					0
	206			0
	208			0
	209					0
	212			0
	214			0
	215				0
	216			0
	218			0
	254		0
	255		0
	256		0
	258		0
	260		0
	262		0
	264		0
	266		0
	268		0
	270		0
	272		0
	274		0
	276		0
	278		0
	288		0
	294									0
	296									0
	298									0
	300									0
	302									0
	304									0
	306									0
	308									0
	310									0
	312									0
	316									0
Pop5	N	0	0	0	0	0	0	0	0	0
	122						0
	124						0
	126						0
	128						0
	130						0
	132						0
	134						0	0
	136						0	0
	138							0
	140							0
	142							0
	144							0		0
	145									0
	146							0	0	0
	147	0								0
	148							0		0
	149	0
	150							0
	151	0
	152							0	0
	153	0
	155	0			0
	156								0
	157	0
	158								0
	159	0
	160								0
	161	0
	162	0							0
	164								0
	165	0
	166								0
	168								0
	169				0
	170								0
	171	0			0
	172								0
	173				0
	174								0
	175				0
	176								0
	177	0			0
	179				0
	181				0
	185				0
	187				0	0
	189					0
	191					0
	193					0
	195					0
	197					0
	198			0
	199					0
	200			0
	201					0
	202			0
	203					0
	204			0
	205					0
	206			0
	208			0
	209					0
	212			0
	214			0
	215				0
	216			0
	218			0
	254		0
	255		0
	256		0
	258		0
	260		0
	262		0
	264		0
	266		0
	268		0
	270		0
	272		0
	274		0
	276		0
	278		0
	288		0
	294									0
	296									0
	298									0
	300									0
	302									0
	304									0
	306									0
	308									0
	310									0
	312									0
	316									0
Warning! Results should be treated with caution given the following:
The sample size in the population Pop2 is less than 5!
The sample size in the population Pop3 is less than 5!
The sample size in the population Pop4 is less than 5!
The sample size in the population Pop5 is less than 5!
There is 6% missing data at the locus 'FCA026' in the population 'Pop1!
There is 8% missing data at the locus 'FCA082' in the population 'Pop1!
There is 6% missing data at the locus 'FCA096' in the population 'Pop1!
There is 6% missing data at the locus 'FCA132' in the population 'Pop1!
There is 6% missing data at the locus 'FCA043' in the population 'Pop1!
There is 8% missing data at the locus 'Lc120' in the population 'Pop1!

[truncated: 27 more sheets: HFP (2), HFP, HFL, APT, ALI, PAS, PAL, ASS, PWASS, HW, HWE, GGD_all, GD_all, GGD_allvGD_all MT, GGD_all2vGD_all2 MT, R, R_10, Gen_fem, GPS_fem, GGD_fem …]
